# Supplementary material for: Mechanisms of substrate recognition by a typhoid toxin secretion-associated muramidase
Source: eLife. 2020 Jan 20;9:e53473. doi: 10.7554/eLife.53473 (PMC6996933; doi:10.7554/eLife.53473)
Supplement: Figure 1—source data 1. [file elife-53473-fig1-data1.xlsx]

## Sheet: Fig. 1b
Supplementary data set 1
corresponding Fig. 1b
experiment 1	WT (CdtB-FLAG)	∆ttsA (CdtB-FLAG)	∆ttsA (CdtB-FLAG) +Sen1395	∆ttsA (CdtB-FLAG) +Sen1395(1-146) - TtsA(147-180)	∆ttsA (CdtB-FLAG) +Sen1395(1-92) - TtsA(93-180)
	0.8	0.02	0.03	0.52	0.67
	0.76	0.04	0.04	0.4	0.74
	0.74	0.01	0.05	0.5	0.82
	0.78	0.03	0.02	0.5	0.75
	0.84	0.01	0.07	0.4	0.77
	0.87	0.02	0.03	0.39	0.78
	0.89	0.01	0.05	0.49	0.84
	0.92	0.04	0.02	0.37	0.97
	0.94	0.05	0.07	0.21	0.93
	0.78	0.02	0.02	0.32	0.86
experiment 2
	0.86	0.06	0.06	0.3	0.74
	0.94	0.03	0.07	0.38	0.93
	0.93	0.06	0.02	0.37	0.85
	0.87	0.02	0.02	0.34	0.87
	0.9	0.01	0.07	0.28	0.93
	0.84	0.02	0.07	0.32	0.88
	0.87	0.02	0.07	0.28	0.91
	0.88	0.04	0.05	0.28	0.89
	0.79	0.01	0.02	0.31	0.9
	0.78	0.03	0.06	0.32	0.88
experiment 3
	0.92	0.05	0.01	0.26	0.93
	0.93	0.02	0.04	0.36	0.91
	0.92	0.05	0.03	0.47	0.89
	0.87	0.06	0.02	0.52	0.76
	0.88	0.02	0.01	0.51	0.79
	0.93	0.01	0.05	0.46	0.81
	0.91	0.02	0.05	0.38	0.78
	0.78	0.04	0.03	0.45	0.85
	0.86	0.05	0.05	0.43	0.79
	0.95	0.02	0.02	0.38	0.93

## Sheet: Fig. 1c
Supplementary data set 1
corresponding Fig. 1c
experiment 1	WT	ΔycbB	TtsA	SEN1395	SEN1395 (1-92) TtsA (93-180)
	80000000	200000000	3000000	2000000	5000000
	80000000	100000000	5000000	500000	600000
	50000000	90000000	4000000	2000000	1000000
experiment 2
	500000000	400000000	3000000	4000000	600000
	200000000	300000000	2000000	4000000	300000
	200000000	60000000	6000000	500000	200000
experiment 3
	100000000	100000000	5000000	4000000	6000000
	300000000	400000000	3000000	900000	400000
	100000000	200000000	5000000	200000	700000

## Sheet: Fig. 1d
Supplementary data set 1
corresponding Fig. 1d			Sen1395					TtsA
			mock	WT/LB	WT/TTIM	ycbB/TTIM		mock	WT/LB	WT/TTIM	ycbB/TTIM
experiment 1	0		0.173	0.165	0.174	0.156		0.172	0.178	0.164	0.173
	5		0.173	0.144	0.171	0.143		0.168	0.169	0.152	0.165
	15		0.168	0.121	0.147	0.132		0.156	0.183	0.141	0.173
	30		0.172	0.103	0.14	0.112		0.167	0.178	0.132	0.165
	60		0.169	0.078	0.112	0.103		0.172	0.169	0.127	0.165
	120		0.172	0.065	0.105	0.086		0.168	0.172	0.074	0.172
	240		0.173	0.034	0.09	0.076		0.168	0.172	0.049	0.164
	360		0.169	0.02	0.089	0.045		0.164	0.168	0.019	0.163
	720		0.168	0.01	0.06	0.023		0.152	0.182	0.01	0.173
experiment 2	0		0.156	0.165	0.174	0.156		0.174	0.168	0.165	0.165
	5		0.165	0.144	0.171	0.143		0.175	0.172	0.153	0.165
	15		0.154	0.121	0.137	0.132		0.173	0.158	0.145	0.164
	30		0.147	0.103	0.145	0.112		0.17	0.164	0.134	0.162
	60		0.164	0.078	0.116	0.101		0.172	0.183	0.132	0.168
	120		0.173	0.065	0.102	0.086		0.178	0.174	0.067	0.172
	240		0.154	0.034	0.09	0.076		0.175	0.171	0.046	0.164
	360		0.174	0.02	0.076	0.045		0.168	0.164	0.027	0.167
	720		0.165	0.01	0.067	0.023		0.154	0.162	0.008	0.165
experiment 3	0		0.183	0.165	0.174	0.156		0.172	0.172	0.168	0.172
	5		0.186	0.144	0.171	0.143		0.166	0.176	0.152	0.167
	15		0.184	0.121	0.157	0.132		0.164	0.172	0.147	0.166
	30		0.184	0.103	0.145	0.112		0.168	0.174	0.13	0.167
	60		0.165	0.078	0.112	0.109		0.172	0.172	0.125	0.165
	120		0.176	0.065	0.095	0.086		0.171	0.178	0.064	0.171
	240		0.172	0.034	0.087	0.076		0.172	0.178	0.034	0.174
	360		0.176	0.02	0.079	0.045		0.166	0.165	0.024	0.165
	720		0.165	0.01	0.064	0.023		0.161	0.174	0.012	0.162

## Sheet: Fig. 1e
Supplementary data set 1
corresponding Fig. 1e
	TTIM				TTIM + YcbB
experiment 1	BSA	lysozyme	TtsA	Sen1395	BSA	lysozyme	TtsA	Sen1395
	0.01	0.15	0.12	0.12	0.02	0.14	0.16	0.02
	0.003	0.18	0.1	0.08	0.01	0.14	0.16	0.02
	0.002	0.12	0.09	0.09	0.005	0.17	0.12	0.02
experiment 2
	0.015	0.2	0.08	0.07	0.004	0.2	0.09	0.01
	0.003	0.17	0.13	0.12	0.002	0.19	0.12	0.009
	0.003	0.19	0.15	0.13	0.003	0.17	0.11	0.007
experiment 3
	0.003	0.12	0.08	0.08	0.015	0.16	0.14	0.025
	0.002	0.15	0.08	0.09	0.011	0.14	0.12	0.034
	0.001	0.17	0.12	0.08	0.007	0.16	0.14	0.03
