# Supplementary material for: Mechanisms of substrate recognition by a typhoid toxin secretion-associated muramidase
Source: eLife. 2020 Jan 20;9:e53473. doi: 10.7554/eLife.53473 (PMC6996933; doi:10.7554/eLife.53473)
Supplement: Figure 2—source data 1. [file elife-53473-fig2-data1.xlsx]

## Sheet: Fig. 2a (TtsA_FLAG)
Supplementary data set 2
corresponding Fig. 2a
WT (TtsA-Flag)
experiment 1	1 (pole)	43745	26670	28551	46362	23759	31936	19932	35486	35486	31724	24593	46362	26098	65250	56245	65857	65857	47065	65603	56055	58555	49761	54065	36510	40637	25618	48680	16337	38862	43585	42393	25318	27199	45010	22407	30584	18580	34134	34134	30372	23241	45010	24746	63898	54893	64505	64505	45713
		39380	26613	36872	45423	25989	27550	64403	39171	39171	36470	23559	45423	24999	61308	56650	58210	61296	46270	64797	57111	64088	51576	61606	33860	46940	26956	61576	20837	43127	45919	38028	25261	35520	44071	24637	26198	63051	37819	37819	35118	22207	44071	23647	59956	55298	56858	59944	44918
		37332	24681	45706	45029	24907	30302	23220	43232	43232	38771	20157	45029	22002	65857	56077	61308	65644	47273	62464	62499	62688	54217	63813	28913	50931	31810	65904	28581	40869	48519	35980	23329	44354	43677	23555	28950	21868	41880	41880	37419	18805	43677	20650	64505	54725	59956	64292	45921
		31752	21889	48478	45225	23522	29458	23600	42869	42869	36684	16844	45225	17848	64654	56055	62766	62677	46951	65790	62321	61088	52719	65345	27930	50585	32042	64710	37837	38521	43276	30400	20537	47126	43873	22170	28106	22248	41517	41517	35332	15492	43873	16496	63302	54703	61414	61325	45599
		26798	18182	49640	42081	20037	28193	25404	41362	41362	34726	13829	42081	14741	60900	55083	55294	63950	46470	58143	56621	45555	50041	54611	24975	48189	31085	60956	49879	33660	40965	25446	16830	48288	40729	18685	26841	24052	40010	40010	33374	12477	40729	13389	59548	53731	53942	62598	45118
		21423	14586	48536	37358	18449	26193	25841	37563	37563	29390	11464	37358	11771	51512	50952	55294	62568	45550	61241	58644	55294	49199	51332	22446	42243	33187	51568	53558	28701	34042	20071	13234	47184	36006	17097	24841	24489	36211	36211	28038	10112	36006	10419	50160	49600	53942	61216	44198
		17762	13179	44712	34596	16931	24736	23747	32677	32677	27203	9323	34596	9779	65857	46246	62785	65857	40401	57044	54898	48360	45204	63589	18618	38225	32197	42334	52661	23167	28754	16410	11827	43360	33244	15579	23384	22395	31325	31325	25851	7971	33244	8427	64505	44894	61433	64505	39049
		14208	12278	42829	31388	15417	23056	20514	27668	27668	24580	8595	31388	8033	65250	44430	65533	60399	35584	56633	52033	48015	41200	59243	15823	33910	33535	34283	56692	18761	24033	12856	10926	41477	30036	14065	21704	19162	26316	26316	23228	7243	30036	6681	63898	43078	64181	59047	34232
		12395	11947	37153	28787	13924	21564	18582	23297	23297	21538	8180	28787	8083	61308	41273	65541	55776	34000	60566	49036	44931	39863	54209	15364	29532	28567	29189	52555	14465	18915	11043	10595	35801	27435	12572	20212	17230	21945	21945	20186	6828	27435	6731	59956	39921	64189	54424	32648
		10817	12063	33182	24558	12309	19961	14939	19563	19563	18577	7480	24558	7532	53045	41430	63950	59128	30955	63054	44480	41314	38446	45050	14659	25983	29838	24028	43143	12794	15115	9465	10711	31830	23206	10957	18609	13587	18211	18211	17225	6128	23206	6180	51693	40078	62598	57776	29603
		10834	11525	30950	22037	11939	18153	13668	17962	17962	16450	6464	22037	6516	48652	40550	62568	49612	29372	54784	36544	36961	36508	39952	16206	22427	27080	23012	37146	11475	13016	9482	10173	29598	20685	10587	16801	12316	16610	16610	15098	5112	20685	5164	47300	39198	61216	48260	28020
		9110	11153	28219	21480	11249	15949	12236	16774	16774	13077	6375	21480	6120	44094	38239	60981	44853	29611	52715	33402	37720	33262	34853	16988	20319	24071	21471	33834	10541	11634	7758	9801	26867	20128	9897	14597	10884	15422	15422	11725	5023	20128	4768	42742	36887	59629	43501	28259
	0.5	9777	11151	26945	18332	11688	15259	11304	14741	14741	9704	6830	18332	6759	41234	38154	60399	42938	30037	48670	31721	31809	29430	35519	17573	20089	23726	24868	31187	9866	10996	8425	9799	25593	16980	10336	13907	9952	13389	13389	8352	5478	16980	5407	39882	36802	59047	41586	28685
		10871	9781	23880	17206	11565	14556	11460	13915	13915	8743	6920	17206	6883	41814	38786	55776	40581	30487	43571	31672	28550	30479	32095	15695	15725	19715	22456	25703	9037	9977	9519	8429	22528	15854	10213	13204	10108	12563	12563	7391	5568	15854	5531	40462	37434	54424	39229	29135
		9614	10388	22656	15681	12315	13957	10990	13072	13072	8065	6223	15681	6662	39627	38125	53162	40842	31653	40685	29479	27988	28946	30855	14528	15337	20860	21372	22344	10389	9536	8262	9036	21304	14329	10963	12605	9638	11720	11720	6713	4871	14329	5310	38275	36773	51810	39490	30301
		10705	9920	19755	15784	11139	14078	10150	12308	12308	8118	6021	15784	5898	41460	38542	52449	38226	30175	38240	26566	26723	27731	28359	13822	14002	22093	21000	21115	10276	9139	9353	8568	18403	14432	9787	12726	8798	10956	10956	6766	4669	14432	4546	40108	37190	51097	36874	28823
		9488	10463	19089	15063	11847	13640	10271	13402	13402	7803	6319	15063	6114	40434	34903	51312	37128	29024	34411	25756	27577	26155	27042	12994	14239	18993	22356	18172	9701	8481	8136	9111	17737	13711	10495	12288	8919	12050	12050	6451	4967	13711	4762	39082	33551	49960	35776	27672
		9600	10894	18402	13926	11957	13136	8998	12916	12916	7306	5709	13926	6180	38546	34044	49053	40924	31816	32976	27096	28044	25011	25105	12178	14657	18662	19857	15629	9736	8871	8248	9542	17050	12574	10605	11784	7646	11564	11564	5954	4357	12574	4828	37194	32692	47701	39572	30464
		9810	10919	17507	13749	11615	12063	7528	12447	12447	7461	5587	13749	5351	38360	33826	47069	38037	30304	28795	26643	28117	25236	23570	11990	15002	18138	19802	15776	8814	9228	8458	9567	16155	12397	10263	10711	6176	11095	11095	6109	4235	12397	3999	37008	32474	45717	36685	28952
		9138	10533	16614	13586	10875	11754	8185	11290	11290	7174	5743	13586	5577	39182	32145	47494	36877	29332	27323	28490	28560	24363	21727	12349	15074	16976	19133	14611	9330	10093	7786	9181	15262	12234	9523	10402	6833	9938	9938	5822	4391	12234	4225	37830	30793	46142	35525	27980
		9199	10511	16178	12722	11203	10760	8284	10897	10897	8165	5749	12722	5455	36516	32506	44887	36171	27971	23244	27930	27815	24428	22733	12961	16434	17468	17732	12828	9335	9698	7847	9159	14826	11370	9851	9408	6932	9545	9545	6813	4397	11370	4103	35164	31154	43535	34819	26619
		8314	11433	15641	13374	11943	8982	7909	12547	12547	7935	5947	13374	5594	35833	32348	47380	35215	27352	23277	26195	27913	25426	22579	13086	15639	15451	18306	13383	9135	9889	6962	10081	14289	12022	10591	7630	6557	11195	11195	6583	4595	12022	4242	34481	30996	46028	33863	26000
		8183	11297	14185	14250	11140	9201	7509	10891	10891	8612	5615	14250	5524	37633	30601	42374	33788	27195	22458	25210	27306	26414	20022	12667	15437	16394	19040	14252	9950	8555	6831	9945	12833	12898	9788	7849	6157	9539	9539	7260	4263	12898	4172	36281	29249	41022	32436	25843
		8405	11051	14231	14074	10968	8764	7884	12407	12407	8225	5628	14074	5883	36141	32124	44014	32606	27543	21550	23883	28097	24872	21385	12971	15454	15382	19972	13484	8712	9405	7053	9699	12879	12722	9616	7412	6532	11055	11055	6873	4276	12722	4531	34789	30772	42662	31254	26191
		8941	10631	13994	14414	10483	7721	7632	13982	13982	7621	5728	14414	6042	37593	31723	42680	31287	27988	22976	21369	26208	23135	21680	12701	15819	14085	18485	12610	9068	9466	7589	9279	12642	13062	9131	6369	6280	12630	12630	6269	4376	13062	4690	36241	30371	41328	29935	26636
	0 (center)	8845	10993	14486	12032	10070	7989	7437	13708	13708	7629	5995	12032	6190	38259	35090	41745	31383	28657	21583	20910	25564	22866	19990	12398	14419	16552	18603	11035	8990	9424	7493	9641	13134	10680	8718	6637	6085	12356	12356	6277	4643	10680	4838	36907	33738	40393	30031	27305
[truncated: 854 more columns]

## Sheet: Fig. 2a (Sen1395_FLAG)
Supplementary data set 2
corresponding Fig. 2a
WT (Sen1395-Flag)
experiment 1	1 (pole)	7283	22185	19224	14029	14234	6895	14427	19890	19799	12131	19635	17732	19083	15065	13898	15567	14280	10598	19965	14766	5661	6101	11475	3227	5610	11475	8160	21420	19890	13770	5931	20833	17872	12677	12882	5543	13075	18538	18447	10779	18283	16380	17731	13713	12546	14215	12928	9246
		8058	21954	16879	14047	15614	6538	12776	21420	18508	14674	19610	17659	18478	13770	10710	13640	10965	11899	17673	15365	6324	6220	10965	3657	6120	10710	8925	23970	19125	8670	6706	20602	15527	12695	14262	5186	11424	20068	17156	13322	18258	16307	17126	12418	9358	12288	9613	10547
		7539	19970	14493	12810	13504	6825	10718	24353	18091	16054	17085	15357	18116	15025	11526	13796	16065	12534	18993	16263	6262	5723	10455	5505	3315	10965	9180	22440	17085	14280	6187	18618	13141	11458	12152	5473	9366	23001	16739	14702	15733	14005	16764	13673	10174	12444	14713	11182
		8324	21162	12926	14395	12318	6357	9405	22695	13938	13593	16626	13566	15057	13943	10557	13221	15555	10950	20650	17380	6603	5495	10200	3244	6375	11730	9180	21930	11985	8670	6972	19810	11574	13043	10966	5005	8053	21343	12586	12241	15274	12214	13705	12591	9205	11869	14203	9598
		6900	21577	12372	13096	11245	5926	9435	19380	14494	15071	16320	14481	14810	11577	9537	11483	13770	11732	17237	20894	6493	5633	9945	4763	6885	10455	9690	22695	19890	6375	5548	20225	11020	11744	9893	4574	8083	18028	13142	13719	14968	13129	13458	10225	8185	10131	12418	10380
		6128	22298	12551	14067	11697	5667	8087	16575	15903	12072	16014	16091	13279	12077	8925	13437	12240	11035	18273	19274	6426	6023	9180	4336	8670	10455	9945	24735	19125	17085	4776	20946	11199	12715	10345	4315	6735	15223	14551	10720	14662	14739	11927	10725	7573	12085	10888	9683
		8706	1499	14062	16575	24141	11644	8403	7606	11174	17118	5396	22097	6500	22513	24504	22513	23537	14229	10999	3734	6673	18558	8925	8727	6630	12240	7905	16065	20145	19890	7354	147	12710	15223	22789	10292	7051	6254	9822	15766	4044	20745	5148	21161	23152	21161	22185	12877
		9192	6500	15893	17340	11507	12804	5113	10222	10519	8180	6046	19666	8727	16401	19031	16401	10344	10896	9845	4307	7099	18362	7905	12517	11475	9435	7395	19890	17850	14280	7840	5148	14541	15988	10155	11452	3761	8870	9167	6828	4694	18314	7375	15049	17679	15049	8992	9544
		12854	4099	11647	10965	10200	12534	10762	10956	13322	7966	4102	19195	12517	12839	11418	12839	22990	10765	8566	5146	4363	24907	6120	11271	14280	9690	6885	23715	17340	11730	11502	2747	10295	9613	8848	11182	9410	9604	11970	6614	2750	17843	11165	11487	10066	11487	21638	9413
		9272	6396	13356	16121	4511	11199	9784	13377	10826	7831	5185	19724	11271	11479	12401	11479	17390	7152	5665	4830	7971	19571	5610	11465	15810	7905	8925	23460	16830	13260	7920	5044	12004	14769	3159	9847	8432	12025	9474	6479	3833	18372	9919	10127	11049	10127	16038	5800
		7181	6405	15763	22988	5937	11590	5506	13865	11248	7979	5866	20491	11465	12291	16367	12291	20662	10727	6087	3436	9708	18788	11475	19898	8160	6630	8670	22695	17085	15810	5829	5053	14411	21636	4585	10238	4154	12513	9896	6627	4514	19139	10113	10939	15015	10939	19310	9375
		8680	5873	24404	22173	5775	7837	9073	12833	9649	6133	7486	20145	19898	8484	11603	8484	12155	5638	9693	3755	5411	17333	11730	11646	3060	9180	7140	19890	17595	17595	7328	4521	23052	20821	4423	6485	7721	11481	8297	4781	6134	18793	18546	7132	10251	7132	10803	4286
	0.5	7237	3467	22097	24559	7547	9421	7770	13182	7673	7132	6278	19724	21339	8403	11646	8517	7790	6301	8385	4884	7357	12842	3060	14656	3060	9435	7395	19380	13770	11985	5885	2115	20745	23207	6195	8069	6418	11830	6321	5780	4926	18372	19987	7051	10294	7165	6438	4949
		7736	3073	19666	23956	6716	12847	9718	16962	8430	7780	8517	20491	14511	7960	14656	10448	8316	4185	10959	1453	6255	13606	6120	12930	3570	8160	7650	17085	14280	14790	6384	1721	18314	22604	5364	11495	8366	15610	7078	6428	7165	19139	13159	6608	13304	9096	6964	2833
		5800	5619	19195	15916	6735	5794	6649	19967	6282	7612	10448	25245	23537	11101	12930	5220	15146	8323	11231	3570	7931	15008	6630	6239	10965	7395	6375	17085	22695	15300	4448	4267	17843	14564	5383	4442	5297	18615	4930	6260	9096	23893	22185	9749	11578	3868	13794	6971
		5329	6450	19724	19847	6044	7936	9699	9143	8732	8101	5220	21882	10344	11172	12735	11231	13806	7148	7222	4317	9404	10747	10965	9156	6120	6120	11730	20145	10965	13005	3977	5098	18372	18495	4692	6584	8347	7791	7380	6749	3868	20530	8992	9820	11383	9879	12454	5796
		6458	7547	20491	16604	4080	8622	8543	11040	11259	7512	6415	29261	22990	14347	12389	7222	12888	7435	7925	4101	9063	10237	10455	11110	6375	11985	12240	19890	8670	13515	5106	6195	19139	15252	2728	7270	7191	9688	9907	6160	5063	27909	21638	12995	11037	5870	11536	6083
		5246	11975	21675	19725	4586	6355	5824	9819	11292	6074	5939	22726	17390	8035	13967	7925	9937	7269	9803	6885	7438	14475	9690	6806	8160	10455	10455	22440	9435	11475	3894	10623	20323	18373	3234	5003	4472	8467	9940	4722	4587	21374	16038	6683	12615	6573	8585	5917
		6645	6308	21882	22297	3886	6563	7459	6239	8902	7637	6505	11402	20662	10508	11072	4193	8668	6851	8295	7508	9517	15102	9180	8433	9180	8160	5355	13770	19380	11985	5293	4956	20530	20945	2534	5211	6107	4887	7550	6285	5153	10050	19310	9156	9720	2841	7316	5499
		3227	6322	29261	19679	5080	6715	7331	9156	10056	5913	9119	19650	25112	14781	18904	3855	4743	6249	7748	7583	8160	10297	6630	6500	10965	6120	4845	10965	13005	14535	1875	4970	27909	18327	3728	5363	5979	7804	8704	4561	7767	18298	23760	13429	17552	2503	3391	4897
		3657	8031	22726	21625	4912	7324	5051	11110	9195	7711	7782	21625	21066	8895	18530	4336	9720	4783	8369	8794	7392	8420	9435	4099	6120	6885	4845	22695	14790	8670	2305	6679	21374	20273	3560	5972	3699	9758	7843	6359	6430	20273	19714	7543	17178	2984	8368	3431
		5505	6814	11402	18247	4384	6553	3249	6806	8330	11778	7825	18247	18360	12368	20755	2258	6850	8095	8708	8868	9649	10095	5355	6396	11475	7395	6120	19890	19890	8925	4153	5462	10050	16895	3032	5201	1897	5454	6978	10426	6473	16895	17008	11016	19403	906	5498	6743
		3244	6996	19650	15444	4789	4898	6987	8433	6700	10338	7351	15444	6289	12650	22372	1498	8384	7420	9225	11138	9876	6675	3825	6405	8160	8160	6375	22695	22695	16320	1892	5644	18298	14092	3437	3546	5635	7081	5348	8986	5999	14092	4937	11298	21020	146	7032	6068
		4763	7349	22341	15370	3419	9545	3166	12168	8559	8652	5469	15370	12828	12153	14194	3222	8068	6581	7913	9845	8739	5021	8160	5246	11985	8670	5355	20145	21420	13515	3411	5997	20989	14018	2067	8193	1814	10816	7207	7300	4117	14018	11476	10801	12842	1870	6716	5229
		2422	8414	12845	13784	4562	7677	6193	9693	8662	10422	6687	13784	9757	16123	17850	3723	6130	5807	5471	8907	8971	9189	3060	6645	7395	5355	5100	24225	21165	13005	1070	7062	11493	12432	3210	6325	4841	8341	7310	9070	5335	12432	8405	14771	16498	2371	4778	4455
	0 (center)	3734	7632	19787	14163	3271	8505	4422	11565	7815	10345	6368	14163	7632	19787	14163	3271	8505	4422	11565	7815	10345	6368	2550	3227	4335	6375	8925	24480	20655	9690	2382	6280	18435	12811	1919	7153	3070	10213	6463	8993	5016	12811	6280	18435	12811	1919	7153	3070
[truncated: 852 more columns]

## Sheet: Fig. 2a (chimera_FLAG)
Supplementary data set 2
corresponding Fig. 2a
WT (chimera-Flag)
experiment 1	1 (pole)	46362	28297	46108	23505	31682	19678	35232	35232	31470	24339	46108	28043	45854	23251	31428	19424	34978	34978	31216	24085	45854	27789	45600	22997	31174	19170	34724	34724	30962	23831	45600	27535	45346	22743	30920	18916	34470	34470	30708	23577	45346	27281	45092	22489	30666	18662	34216	34216
		45423	36618	45169	25735	27296	64149	38917	38917	36216	23305	45169	36364	44915	25481	27042	63895	38663	38663	35962	23051	44915	36110	44661	25227	26788	63641	38409	38409	35708	22797	44661	35856	44407	24973	26534	63387	38155	38155	35454	22543	44407	35602	44153	24719	26280	63133	37901	37901
		45029	45452	44775	24653	30048	22966	42978	42978	38517	19903	44775	45198	44521	24399	29794	22712	42724	42724	38263	19649	44521	44944	44267	24145	29540	22458	42470	42470	38009	19395	44267	44690	44013	23891	29286	22204	42216	42216	37755	19141	44013	44436	43759	23637	29032	21950	41962	41962
		45225	48224	44971	23268	29204	23346	42615	42615	36430	16590	44971	47970	44717	23014	28950	23092	42361	42361	36176	16336	44717	47716	44463	22760	28696	22838	42107	42107	35922	16082	44463	47462	44209	22506	28442	22584	41853	41853	35668	15828	44209	47208	43955	22252	28188	22330	41599	41599
		42081	49386	41827	19783	27939	25150	41108	41108	34472	13575	41827	49132	41573	19529	27685	24896	40854	40854	34218	13321	41573	48878	41319	19275	27431	24642	40600	40600	33964	13067	41319	48624	41065	19021	27177	24388	40346	40346	33710	12813	41065	48370	40811	18767	26923	24134	40092	40092
		31388	42575	31134	15163	22802	20260	27414	27414	24326	8341	31134	42321	30880	14909	22548	20006	27160	27160	24072	8087	30880	42067	30626	14655	22294	19752	26906	26906	23818	7833	30626	41813	30372	14401	22040	19498	26652	26652	23564	7579	30372	41559	30118	14147	21786	19244	26398	26398
		34596	44458	34342	16677	24482	23493	32423	32423	26949	9069	34342	44204	34088	16423	24228	23239	32169	32169	26695	8815	34088	43950	33834	16169	23974	22985	31915	31915	26441	8561	33834	43696	33580	15915	23720	22731	31661	31661	26187	8307	33580	43442	33326	15661	23466	22477	31407	31407
		31388	42575	31134	15163	22802	20260	27414	27414	24326	8341	31134	42321	30880	14909	22548	20006	27160	27160	24072	8087	30880	42067	30626	14655	22294	19752	26906	26906	23818	7833	30626	41813	30372	14401	22040	19498	26652	26652	23564	7579	30372	41559	30118	14147	21786	19244	26398	26398
		28787	36899	28533	13670	21310	18328	23043	23043	21284	7926	28533	36645	28279	13416	21056	18074	22789	22789	21030	7672	28279	36391	28025	13162	20802	17820	22535	22535	20776	7418	28025	36137	27771	12908	20548	17566	22281	22281	20522	7164	27771	35883	27517	12654	20294	17312	22027	22027
		24558	32928	24304	12055	19707	14685	19309	19309	18323	7226	24304	32674	24050	11801	19453	14431	19055	19055	18069	6972	24050	32420	23796	11547	19199	14177	18801	18801	17815	6718	23796	32166	23542	11293	18945	13923	18547	18547	17561	6464	23542	31912	23288	11039	18691	13669	18293	18293
		22037	30696	21783	11685	17899	13414	17708	17708	16196	6210	21783	30442	21529	11431	17645	13160	17454	17454	15942	5956	21529	30188	21275	11177	17391	12906	17200	17200	15688	5702	21275	29934	21021	10923	17137	12652	16946	16946	15434	5448	21021	29680	20767	10669	16883	12398	16692	16692
		21480	27965	21226	10995	15695	11982	16520	16520	12823	6121	21226	27711	20972	10741	15441	11728	16266	16266	12569	5867	20972	27457	20718	10487	15187	11474	16012	16012	12315	5613	20718	27203	20464	10233	14933	11220	15758	15758	12061	5359	20464	26949	20210	9979	14679	10966	15504	15504
	0.5	18332	26691	18078	11434	15005	11050	14487	14487	9450	6576	18078	26437	17824	11180	14751	10796	14233	14233	9196	6322	17824	26183	17570	10926	14497	10542	13979	13979	8942	6068	17570	25929	17316	10672	14243	10288	13725	13725	8688	5814	17316	25675	17062	10418	13989	10034	13471	13471
		17206	23626	16952	11311	14302	11206	13661	13661	8489	6666	16952	23372	16698	11057	14048	10952	13407	13407	8235	6412	16698	23118	16444	10803	13794	10698	13153	13153	7981	6158	16444	22864	16190	10549	13540	10444	12899	12899	7727	5904	16190	22610	15936	10295	13286	10190	12645	12645
		15681	22402	15427	12061	13703	10736	12818	12818	7811	5969	15427	22148	15173	11807	13449	10482	12564	12564	7557	5715	15173	21894	14919	11553	13195	10228	12310	12310	7303	5461	14919	21640	14665	11299	12941	9974	12056	12056	7049	5207	14665	21386	14411	11045	12687	9720	11802	11802
		15784	19501	15530	10885	13824	9896	12054	12054	7864	5767	15530	19247	15276	10631	13570	9642	11800	11800	7610	5513	15276	18993	15022	10377	13316	9388	11546	11546	7356	5259	15022	18739	14768	10123	13062	9134	11292	11292	7102	5005	14768	18485	14514	9869	12808	8880	11038	11038
		15063	18835	14809	11593	13386	10017	13148	13148	7549	6065	14809	18581	14555	11339	13132	9763	12894	12894	7295	5811	14555	18327	14301	11085	12878	9509	12640	12640	7041	5557	14301	18073	14047	10831	12624	9255	12386	12386	6787	5303	14047	17819	13793	10577	12370	9001	12132	12132
		13926	18148	13672	11703	12882	8744	12662	12662	7052	5455	13672	17894	13418	11449	12628	8490	12408	12408	6798	5201	13418	17640	13164	11195	12374	8236	12154	12154	6544	4947	13164	17386	12910	10941	12120	7982	11900	11900	6290	4693	12910	17132	12656	10687	11866	7728	11646	11646
		13749	17253	13495	11361	11809	7274	12193	12193	7207	5333	13495	16999	13241	11107	11555	7020	11939	11939	6953	5079	13241	16745	12987	10853	11301	6766	11685	11685	6699	4825	12987	16491	12733	10599	11047	6512	11431	11431	6445	4571	12733	16237	12479	10345	10793	6258	11177	11177
		13586	16360	13332	10621	11500	7931	11036	11036	6920	5489	13332	16106	13078	10367	11246	7677	10782	10782	6666	5235	13078	15852	12824	10113	10992	7423	10528	10528	6412	4981	12824	15598	12570	9859	10738	7169	10274	10274	6158	4727	12570	15344	12316	9605	10484	6915	10020	10020
		12722	15924	12468	10949	10506	8030	10643	10643	7911	5495	12468	15670	12214	10695	10252	7776	10389	10389	7657	5241	12214	15416	11960	10441	9998	7522	10135	10135	7403	4987	11960	15162	11706	10187	9744	7268	9881	9881	7149	4733	11706	14908	11452	9933	9490	7014	9627	9627
		13374	15387	13120	11689	8728	7655	12293	12293	7681	5693	13120	15133	12866	11435	8474	7401	12039	12039	7427	5439	12866	14879	12612	11181	8220	7147	11785	11785	7173	5185	12612	14625	12358	10927	7966	6893	11531	11531	6919	4931	12358	14371	12104	10673	7712	6639	11277	11277
		14250	13931	13996	10886	8947	7255	10637	10637	8358	5361	13996	13677	13742	10632	8693	7001	10383	10383	8104	5107	13742	13423	13488	10378	8439	6747	10129	10129	7850	4853	13488	13169	13234	10124	8185	6493	9875	9875	7596	4599	13234	12915	12980	9870	7931	6239	9621	9621
		14074	13977	13820	10714	8510	7630	12153	12153	7971	5374	13820	13723	13566	10460	8256	7376	11899	11899	7717	5120	13566	13469	13312	10206	8002	7122	11645	11645	7463	4866	13312	13215	13058	9952	7748	6868	11391	11391	7209	4612	13058	12961	12804	9698	7494	6614	11137	11137
		14414	13912	14332	10401	7639	7550	13900	13900	7539	5646	14332	13830	14250	10319	7557	7468	13818	13818	7457	5564	14250	13748	14168	10237	7475	7386	13736	13736	7375	5482	14168	13666	14086	10155	7393	7304	13654	13654	7293	5400	14086	13584	14004	10073	7311	7222	13572	13572
	0 (center)	12032	14432	11978	10016	7935	7383	13654	13654	7575	5941	11978	14378	11924	9962	7881	7329	13600	13600	7521	5887	11924	14324	11870	9908	7827	7275	13546	13546	7467	5833	11870	14270	11816	9854	7773	7221	13492	13492	7413	5779	11816	14216	11762	9800	7719	7167	13438	13438
[truncated: 854 more columns]

## Sheet: Fig. 2a ycbB (TtsA_FLAG)
Supplementary data set 2
corresponding Fig. 2a
ycbB (TtsA-Flag)
experiment 1	1 (pole)	13382	49725	56100	36550	62812	32583	32640	24395	27512	45022	30345	26520	38505	30317	28560	28532	31903	24168	31025	31195	32300	36947	14337	32895	35275	32215	22610	32272	18870	32271.7	12030	48373	54748	35198	61460	31231	31288	23043	26160	43670	28993	25168	37153	28965	27208	27180	30551	22816
		16830	46985	57876	36175	60631	40661	31437	26385	28806	45135	31717	32286	40538	32678	27085	26366	33356	30541	31850	34136	29739	35377	12922	36758	30026	28551	18126	28097	24580	28084.1	15478	45633.3	56524	34822.6	59279	39309	30085	25033	27454	43783	30365	30934	39186	31326	25733	25014	32004	29189
		17626	45009	58268	39559	57829	43437	29785	28821	30425	45135	30534	34628	43997	32961	25920	22145	32403	34204	30753	36296	26442	32683	13558	38929	25775	27547	17291	22421	25096	22382.1	16274	43656.5	56916	38206.8	56477	42085	28433	27469	29073	43783	29182	33276	42645	31609	24568	20793	31051	32852
		16585	43705	53151	36915	56534	45135	24378	30345	29359	45135	29237	31015	41918	31960	22221	19218	28974	31320	30117	37490	23194	26768	12896	35400	22591	25174	15362	19381	23171	19375.9	15233	42353	51799	35563.2	55182	43783	23026	28993	28007	43783	27885	29663	40566	30608	20869	17866	27622	29968
		14535	40288	49960	39914	55728	44947	21781	29895	27231	45135	27176	28339	38119	29391	20186	15687	27163	27425	26931	35345	20683	23564	11805	31037	20098	23310	11756	15880	21200	15761	13183	38936	48608	38562.4	54376	43595	20429	28543	25879	43783	25824	26987	36767	28039	18834	14335	25811	26073
		11383	38301	43747	37202	53693	45070	18945	27578	24374	44788	28060	20678	35229	29061	18054	16850	23097	24446	23990	35059	18629	20546	11512	26945	19106	21403	11624	13293	19041	13226	10031	36949	42395	35849.5	52341	43718	17593	26226	23022	43436	26708	19326	33877	27709	16702	15498	21745	23094
		9027	36557	41843	36599	53448	44372	17875	24735	20518	42664	25433	17941	33974	27427	15876	15395	23719	17784	19630	34606	18445	18244	11288	23745	17293	18797	10501	13149	16268	13026	7675	35204.8	40491	35247.3	52096	43020	16523	23383	19166	41312	24081	16589	32622	26075	14524	14043	22367	16432
		7640	34305	38335	32713	52658	39633	15911	20699	17021	34288	23723	11966	30783	25368	15099	15267	21691	15356	16245	32022	19097	17690	11731	19114	17066	17514	9945	12595	12852	12511.4	6288	32952.6	36983	31361.2	51306	38281	14559	19347	15669	32936	22371	10614	29431	24016	13747	13915	20339	14004
		7762	33168	36125	28783	50766	33369	14960	19884	16240	28992	23470	9583	29148	25113	14657	15260	20920	14113	16293	28195	17255	16755	11412	15177	15703	17414	9183	12385	12314	12328.1	6410	31816.4	34773	27431.2	49414	32017	13608	18532	14888	27640	22118	8231	27796	23761	13305	13908	19568	12761
		5865	31120	31434	27134	44063	27081	14808	17850	13973	26244	24291	10036	25618	21647	13514	17004	22044	14524	15203	25641	15587	14229	12113	12211	15185	15134	10470	11783	11073	11580.3	4513	29768.2	30082	25781.9	42711	25729	13456	16498	12621	24892	22939	8684	24266	20295	12162	15652	20692	13172
		6242	29376	29458	26623	39900	22606	16155	15659	10750	22545	25727	11071	25644	20825	12492	13411	21216	14743	14077	22418	14854	14243	13219	9782	14638	16169	8812	9616	11804	9523.41	4890	28024	28106	25270.9	38548	21254	14803	14307	9398	21193	24375	9719	24292	19473	11140	12059	19864	13391
		7609	31520	30270	24306	35363	20051	14280	14598	9514	19942	24435	12723	25029	21108	14043	12139	20962	15437	14553	21136	14663	14801	13274	7607	14638	16430	9152	8900	9441	8862.98	6257	30168	28918	22954.3	34011	18699	12928	13246	8162	18590	23083	11371	23677	19756	12691	10787	19610	14085
	0.5	8486	32662	28978	23703	33707	19377	14273	13458	7698	20374	23169	12212	23368	23375	13129	10883	19042	15503	13480	20292	13940	14228	13699	7692	15309	18409	9033	8349	9095	8188.25	7134	31310.4	27626	22351.1	32355	18025	12921	12106	6346	19022	21817	10860	22016	22023	11777	9531	17690	14151
		7772	29517	29771	22222	35291	19975	14352	11988	7316	20958	22185	12477	22100	23347	11590	10298	16671	17822	12862	20230	14082	15447	15093	6789	16603	16556	8315	7450	9122	7232.9	6420	28164.8	28419	20870	33939	18623	13000	10636	5964	19606	20833	11125	20748	21995	10238	8946	15319	16470
		7140	27210	31430	24880	33660	19863	14027	11384	7034	21735	21544	12151	20047	23715	12968	9077	14292	18717	13561	19498	14181	16125	15760	5972	17826	19950	8778	7425	9377	7297.62	5788	25857.5	30078	23527.7	32308	18511	12675	10032	5682	20383	20192	10799	18695	22363	11616	7725	12940	17365
		7813	27591	31972	24320	36236	21307	13206	11475	6305	23492	20603	12606	20760	22440	11699	9747	13883	18690	15181	18519	13217	17413	14113	6205	18212	19771	10385	7698	8150	7540.07	6461	26239	30620	22968.1	34884	19955	11854	10123	4953	22140	19251	11254	19408	21088	10347	8395	12531	17338
		7640	27822	30244	23200	39978	23824	12410	12388	6848	25197	20345	13552	21342	21788	9694	10947	12897	17638	14312	18002	13430	18843	13530	5538	18189	19076	8809	8115	9812	8160.82	6288	26469.5	28892	21848.4	38626	22472	11058	11036	5496	23845	18993	12200	19990	20436	8342	9595	11545	16286
		6416	26514	29863	24162	43105	26465	11243	13087	7385	28921	20103	15093	20988	21392	9315	12065	12852	17722	14707	19217	13756	18410	13290	4755	18372	18209	9270	9185	9522	9219.17	5064	25161.9	28511	22809.8	41753	25113	9891	11735	6033	27569	18751	13741	19636	20040	7963	10713	11500	16370
		5906	25512	30215	23570	44994	28935	9695	14195	7318	27550	17873	14913	21198	21335	9383	12133	11781	17587	15702	18982	16022	18966	11245	4014	18801	19027	9002	10404	8511	10379.8	4554	24160.2	28863	22218.2	43642	27583	8343	12843	5966	26198	16521	13561	19846	19983	8031	10781	10429	16235
		5610	25541	30633	20489	44997	25982	9496	13817	5818	26752	18820	16288	20459	20693	10581	12970	13166	16906	18151	19248	16603	19300	9366	4158	18581	19122	10020	10801	9912	10591.8	4258	24188.8	29281	19137.1	43645	24630	8144	12465	4466	25400	17468	14936	19107	19341	9229	11618	11814	15554
		5437	24837	26973	20631	44573	26156	11468	13449	5725	26561	19848	15525	20714	19531	11332	15307	13266	17062	18965	18923	16277	18765	9583	3750	17183	18731	9978	10877	9576	10818.8	4085	23485	25621	19278.9	43221	24804	10116	12097	4373	25209	18496	14173	19362	18179	9980	13955	11914	15710
		6426	26039	26797	20277	42713	25349	10847	12467	6759	24861	18882	18102	20936	19720	11371	18313	14370	18320	19560	18961	15523	16996	10034	3817	17312	18827	11514	11212	9139	11040.7	5074	24686.6	25445	18925.2	41361	23997	9495	11115	5407	23509	17530	16750	19584	18368	10019	16961	13018	16968
		6987	24549	22146	18113	40285	23240	11045	11972	6740	23947	19662	17171	22146	21203	11028	19317	14100	21093	20715	22305	16455	18555	10008	4615	18156	18564	10823	10675	9888	9959.15	5635	23197.4	20794	16761.3	38933	21888	9693	10620	5388	22595	18310	15819	20794	19851	9676	17965	12748	19741
		6681	23578	20818	17425	38979	23536	12368	11620	6221	24970	20704	16962	22636	20608	12475	19924	14947	22524	21717	24494	16001	17751	10073	4674	16217	17947	11168	10033	10160	10174	5329	22226.3	19466	16073.4	37627	22184	11016	10268	4869	23618	19352	15610	21284	19256	11123	18572	13595	21172
		6375	26214	20580	17193	39915	22802	12523	10200	6400	23891	21245	19744	22375	20003	14007	20410	14176	23248	21001	26190	15385	14244	9961	5554	14792	18961	10061	10358	9608	10313.7	5023	24862	19228	15841.4	38563	21450	11171	8848	5048	22539	19893	18392	21023	18651	12655	19058	12824	21896
	0 (center)	6375	23970	18615	18315	37238	22837	12935	9551	6622	23658	21620	21459	22348	19317	16065	19352	13770	24114	20457	27384	14021	15045	10231	5015	15030	20014	11586	9217	8655	8075.01	5023	22618	17263	16962.9	35886	21485	11583	8199	5270	22306	20268	20107	20996	17965	14713	18000	12418	22762
[truncated: 852 more columns]

## Sheet: Fig. 2c (WT)
Supplementary data set 2
corresponding Fig. 2c
WT
experiment 1	1 (pole)	22749	34121	29897	26387	27399	45503	20359	58788	16810	28311	41968	15580	52881	60481	52981	59325	53702	23727	57302	52469	59636	23761	47333	37755	49150	58593	44225	32192	36319	21300	21326	32698	28474	24964	25976	44080	18936	57365	15387	26888	40545	14157	51458	59058	51558	57902	52279	22304
		28369	38401	35542	32816	37568	54090	27924	61024	24492	36404	46310	22053	57864	57581	57281	57145	57841	27892	58014	58563	54764	29509	58407	41929	48309	58554	48860	29542	42622	22638	26946	36978	34119	31393	36145	52667	26501	59601	23069	34981	44887	20630	56441	56158	55858	55722	56418	26469
		30585	45678	38258	32373	46997	59860	32649	58370	30893	41848	52800	24840	53705	56569	51819	56473	58593	31242	49977	60709	56939	32317	58593	46339	47640	58575	48922	24595	46613	27492	29162	44255	36835	30950	45574	58437	31226	56947	29470	40425	51377	23417	52282	55146	50396	55050	57170	29819
		30333	51753	35965	28539	57769	60454	34956	59293	34657	42859	58485	25737	52523	56314	44953	57823	58593	30663	58485	58593	58593	32978	58485	48269	44737	57543	48365	23612	46267	27724	28910	50330	34542	27116	56346	59031	33533	57870	33234	41436	57062	24314	51100	54891	43530	56400	57170	29240
		28205	52721	33061	24505	61148	58563	36298	60709	29323	43448	54764	27821	52243	57860	39154	56939	54964	25262	57122	58552	58575	32898	58593	48656	43205	56578	43319	20657	43871	26767	26782	51298	31638	23082	59725	57140	34875	59286	27900	42025	53341	26398	50820	56437	37731	55516	53541	23839
		24341	47567	27827	20824	57135	56023	30581	55151	28174	45865	53705	28409	58593	54018	33920	50282	45580	19707	54018	58593	58205	31685	54964	44924	35949	54215	37263	18128	37925	28869	22918	46144	26404	19401	55712	54600	29158	53728	26751	44442	52282	26986	57170	52595	32497	48859	44157	18284
		18059	41952	24191	16251	60361	51164	25352	49977	24950	47364	52523	26588	57122	47522	33388	45545	38206	15082	57304	58290	48923	32624	56317	42646	30646	50785	34256	14300	33907	27879	16636	40529	22768	14828	58938	49741	23929	48554	23527	45941	51100	25165	55699	46099	31965	44122	36783	13659
		14603	38823	19212	14330	60469	44722	22667	41653	19890	44333	52243	24752	52131	45414	32782	43308	32866	12980	51466	56317	45441	33671	56524	37933	27658	46873	29383	11505	29592	29217	13180	37400	17789	12907	59046	43299	21244	40230	18467	42910	50820	23329	50708	43991	31359	41885	31443	11557
		13287	33861	16899	11013	60623	41868	19114	34744	16599	40762	45038	23428	49229	41504	32203	41787	27132	12130	45026	52800	40393	32342	58593	30715	25533	44423	27118	11046	25214	24249	11864	32438	15476	9590	59200	40445	17691	33321	15176	39339	43615	22005	47806	40081	30780	40364	25709	10707
		9126	28815	14309	11128	58290	38728	13678	30003	14038	40360	42948	22535	45134	39934	32967	42069	26558	12117	42703	58035	37146	32887	60709	28196	26336	41356	26609	10341	21665	25520	7703	27392	12886	9705	56867	37305	12255	28580	12615	38937	41525	21112	43711	38511	31544	40646	25135	10694
		9685	24827	11543	11024	49709	35732	11827	27199	12036	39359	43042	21646	42611	36329	32442	44695	25524	11965	37557	54982	34930	31615	55151	26333	24322	40201	26293	11888	18109	22762	8262	23404	10120	9601	48286	34309	10404	25776	10613	37936	41619	20223	41188	34906	31019	43272	24101	10542
		9101	25045	8445	10088	45446	34104	11612	24315	11385	35118	37470	22260	40982	35459	32934	48014	24586	13466	35638	55113	34859	30465	49977	27553	25016	36835	23324	12670	16001	19753	7678	23622	7022	8665	44023	32681	10189	22892	9962	33695	36047	20837	39559	34036	31511	46591	23163	12043
	0.5	6757	25889	7316	10491	39343	30402	9965	24571	11003	34587	35598	21597	38115	34565	31931	52524	23452	13879	35031	58507	34316	28961	58593	24288	25436	36440	22298	13255	15771	19408	5334	24466	5893	9068	37920	28979	8542	23148	9580	33164	34175	20174	36692	33142	30508	51101	22029	12456
		7556	24018	5615	8636	34005	29677	9671	23450	9655	29353	32179	22939	34710	35244	32808	56134	23645	11876	32994	58593	34392	27780	56317	24951	26938	34340	23733	11377	11407	15397	6133	22595	4192	7213	32582	28254	8248	22027	8232	27930	30756	21516	33287	33821	31385	54711	22222	10453
		8170	25240	4460	9140	28904	28785	9970	21834	9799	27315	27808	22518	35100	36844	34504	56317	25128	12683	30759	57860	32393	25146	56524	25366	23120	33457	24556	10210	11019	16542	6747	23817	3037	7717	27481	27362	8547	20411	8376	25892	26385	21095	33677	35421	33081	54894	23705	11260
		7812	24814	4226	8125	24577	27957	8388	21894	8995	23783	25099	21839	33932	37448	33571	56524	23380	11214	30259	58593	33871	23176	55382	26696	22046	31499	27114	9504	9684	17775	6389	23391	2803	6702	23154	26534	6965	20471	7572	22360	23676	20416	32509	36025	32148	55101	21957	9791
		9228	24453	4098	8369	20371	27885	8620	20712	9103	21747	23300	21627	35886	37975	38129	55478	22282	9115	30441	58593	30967	21435	50564	26687	21518	28779	27872	8676	9921	14675	7805	23030	2675	6946	18948	26462	7197	19289	7680	20324	21877	20204	34463	36552	36706	54055	20859	7692
		10526	23161	3986	9506	17197	26129	3701	16872	9156	20429	21491	20804	34560	36276	37965	50667	23004	8801	29176	58593	33272	20430	46048	23961	21764	27693	27224	7860	10339	14344	9103	21738	2563	8083	15774	24706	2278	15449	7733	19006	20068	19381	33137	34853	36542	49244	21581	7378
		11020	23213	3380	7817	15815	25462	3506	16955	9374	19044	17833	20297	35004	33840	39265	47605	22731	8025	25443	57966	32773	18644	41597	22482	21520	26619	26857	7672	10684	13820	9597	21790	1957	6394	14392	24039	2083	15532	7951	17621	16410	18874	33581	32417	37842	46182	21308	6602
		11459	21235	3554	6971	11311	23553	2921	16108	10942	19896	16418	19884	32613	31355	41565	43342	22628	7947	23498	38229	31342	16583	41049	21892	21742	22953	25683	8031	10756	12658	10036	19812	2131	5548	9888	22130	1498	14685	9519	18473	14995	18461	31190	29932	40142	41919	21205	6524
		10253	20601	3066	8202	10920	21655	3842	17032	11968	18523	14617	16573	31899	27542	37480	40061	23431	8342	23582	38392	31589	15946	38979	21342	22595	23327	23044	8643	12116	13150	8830	19178	1643	6779	9497	20232	2419	15609	10545	17100	13194	15150	30476	26119	36057	38638	22008	6919
		9562	20923	3005	6510	10202	20816	4223	14454	14076	16528	14619	16674	29848	25147	37625	37011	24478	6523	23379	38094	31409	15336	39908	21872	22433	21197	20012	8768	11321	11133	8139	19500	1582	5087	8779	19393	2800	13031	12653	15105	13196	15251	28425	23724	36202	35588	23055	5100
		9850	21055	3701	6824	8483	18816	5985	14232	15847	17206	15592	16300	27391	24578	36479	36151	26747	6046	21488	28591	32812	15455	41479	22367	24455	23150	22681	8349	11119	12076	8427	19632	2278	5401	7060	17393	4562	12809	14424	15783	14169	14877	25968	23155	35056	34728	25324	4623
		9620	22402	3506	6877	7312	17389	2516	14942	15362	17329	14556	14990	24491	24870	33195	33583	25370	6788	21661	28549	13172	15949	24499	22758	22864	21593	19175	8653	11136	11064	8197	20979	2083	5454	5889	15966	1093	13519	13939	15906	13133	13567	23068	23447	31772	32160	23947	5365
		10990	23897	2921	6043	7799	16610	2731	14277	12203	17513	14974	15281	22499	27090	31854	33538	26227	7732	21509	27168	12418	15934	26179	23810	22687	21793	19423	8383	11501	9767	9567	22474	1498	4620	6376	15187	1308	12854	10780	16090	13551	13858	21076	25667	30431	32115	24804	6309
	0 (center)	12576	24896	3842	6892	8326	16665	3272	14653	13201	18094	13123	15646	23988	30667	29340	32763	8288	6679	9784	7861	14052	16435	25196	24623	23169	24125	18355	8080	10101	12234	11153	23473	2419	5469	6903	15242	1849	13230	11778	16671	11700	14223	22565	29244	27917	31340	6865	5256
[truncated: 854 more columns]

## Sheet: Fig. 2c (ttsA)
Supplementary data set 2
corresponding Fig. 2c
ΔttsA
experiment 1	1 (pole)	25279	25279	18813	29934	5943	10192	22406	10442	3382	6600	21644	21644	2296	16797	11950	10067	8224	2937	7664	6181	1294	68	19922	15836	373	9707	8625	5300	3578	7897	25122	25122	18656	29777	5786	10035	22249	10285	3225	6443	21487	21487	2139	16640	11793	9910	8067	2780
		25123	25123	19503.1	26189.8	5562.06	12800.4	23610.4	8966.56	8708.3	10921.2	22726	22726	6113.5	16401.1	14371.4	9553.6	9825.2	5014.41	10762.8	5285.68	8284.83	4191.27	17306.6	18087	2565.56	13299.1	12917.4	6556.73	4599.8	7383.6	24966	24966	19346.1	26032.8	5405.06	12643.4	23453.4	8809.56	8551.3	10764.2	22569	22569	5956.5	16244.1	14214.4	9396.6	9668.2	4857.41
		19875	19875	19223.6	25864.8	5591.75	17635.3	26604	8491.22	8602.4	17011	24408	24408	7079	14631.6	15268.6	5083.2	10664.5	3155.13	11488.5	5289.02	10136.8	4736.35	23122.1	15161.6	4422.24	6368.4	14474.7	5520.54	5721.8	2913.2	19718	19718	19066.6	25707.8	5434.75	17478.3	26447	8334.22	8445.4	16854	24251	24251	6922	14474.6	15111.6	4926.2	10507.5	2998.13
		25935	25935	15533.7	26597.9	6537.54	18848.8	25941.3	8098.75	8217.9	20165.4	22686	22686	4867.2	18374.8	18538.7	9434	9103.9	2245.43	13873.7	5908.03	10764.4	1792.63	24418.5	15020.3	4000.81	10811.8	13744.1	5194.96	4437.9	7264	25778	25778	15376.7	26440.9	6380.54	18691.8	25784.3	7941.75	8060.9	20008.4	22529	22529	4710.2	18217.8	18381.7	9277	8946.9	2088.43
		21531	21531	17433.5	21747.7	7686.24	21575.3	25000.3	7404.64	9275.8	22087	22365	22365	3120.8	15227.2	18285.9	8290.3	8923.7	3905.9	15221.7	7095.7	7646.97	3229.97	22210.6	14606.5	1173.89	7562.2	14677.9	5213.36	6294.3	6120.3	21374	21374	17276.5	21590.7	7529.24	21418.3	24843.3	7247.64	9118.8	21930	22208	22208	2963.8	15070.2	18128.9	8133.3	8766.7	3748.9
		22655	22655	18658.9	22285	7371.24	21392.3	21277.3	8381.84	12227.9	21875.7	22565	22565	5220	16647	17712	8969.6	7437	4105.83	14909.8	7784.72	6964.15	2919.9	22370.5	10971.9	3095.97	8584.7	14481.2	6023.6	7030.1	6799.6	22498	22498	18501.9	22128	7214.24	21235.3	21120.3	8224.84	12070.9	21718.7	22408	22408	5063	16490	17555	8812.6	7280	3948.83
		23155	23155	17172.3	24775.9	9383.92	23864.7	16714.9	6837.23	10320.9	20195.9	27292	27292	6413.8	11373	13111.3	7497.9	7056.1	3241.49	17861.2	8092.22	7036.32	3876.62	22959.4	10421.5	4612	7320.4	17119	5466.51	5561	5327.9	22998	22998	17015.3	24618.9	9226.92	23707.7	16557.9	6680.23	10163.9	20038.9	27135	27135	6256.8	11216	12954.3	7340.9	6899.1	3084.49
		21843	21843	15383.2	22872	7649.34	25170	13248.8	8396.53	7961.8	17107.4	32380	32380	7939.6	17277.4	15742.4	6758.8	5133.3	4213.58	17020.4	8302.14	8518.68	6703.98	23361.3	13723.8	4124.26	10090.3	15052.5	7686.73	7063.8	4588.8	21686	21686	15226.2	22715	7492.34	25013	13091.8	8239.53	7804.8	16950.4	32223	32223	7782.6	17120.4	15585.4	6601.8	4976.3	4056.58
		23061	23061	15761.7	24984.9	7019.57	26198.6	11848.4	7456.34	9556.3	18874.9	31218	31218	8160	16461.9	18650.1	12608.4	7704.2	3686.3	17576.3	8969.06	5797.97	4733.2	21571.8	11564.2	3880.57	8471.5	13687.5	7622.24	7286.5	10438.4	22904	22904	15604.7	24827.9	6862.57	26041.6	11691.4	7299.34	9399.3	18717.9	31061	31061	8003	16304.9	18493.1	12451.4	7547.2	3529.3
		24155	24155	16893.7	24619.2	9398.43	27539.6	9971.7	8241.85	9627.8	19644.2	36145	36145	6354	15939.2	13186	7737	10512.8	3455.46	16104.1	11083.1	8258.22	3547.43	19774.2	10521.2	969.98	10128.3	13707.6	10539.8	7111.6	5567	23998	23998	16736.7	24462.2	9241.43	27382.6	9814.7	8084.85	9470.8	19487.2	35988	35988	6197	15782.2	13029	7580	10355.8	3298.46
		17782	17782	20275.1	23361.7	9489.35	22592.7	8817.8	7184.82	10278.6	23106.3	26972	26972	10307	18738.2	9193.6	8476.4	8644.7	3733.17	14944.6	12146.2	8103.29	2369.96	20900.6	12380.8	5307.81	8009.8	15360.9	11759.5	9559.8	6306.4	17625	17625	20118.1	23204.7	9332.35	22435.7	8660.8	7027.82	10121.6	22949.3	26815	26815	10150	18581.2	9036.6	8319.4	8487.7	3576.17
		22249	22249	20305	24895	9584.71	21811.6	8799.6	8746.47	10014.9	24603.9	25890	25890	4923.6	16276.5	8820.9	7923.4	7526.8	3736.21	16044.2	10197	7801.75	5337.44	22114.2	13946.6	4113	11853.3	15342.4	9338.8	9433.3	5753.4	22092	22092	20148	24738	9427.71	21654.6	8642.6	8589.47	9857.9	24446.9	25733	25733	4766.6	16119.5	8663.9	7766.4	7369.8	3579.21
	0.5	22624	22624	18917.2	25932.2	13433.8	23454.3	13181.6	10571.6	13112.2	23609.8	34863	34863	6413.4	17426.9	13398	13398.5	9494.7	2430.88	16141	10145.2	8500.3	5790.67	20536.2	11436.7	4216.92	8696	18132.9	8213.12	4942.7	11228.5	22467	22467	18760.2	25775.2	13276.8	23297.3	13024.6	10414.6	12955.2	23452.8	34706	34706	6256.4	17269.9	13241	13241.5	9337.7	2273.88
		19563	19563	15783.9	22962.4	11595.3	18020.9	9867.3	11329.6	13401.7	21230.9	34423	34423	4066.1	10527.5	11743.7	7794.3	8996.4	3012.47	14734	9875.08	7172.67	3143.46	23954.1	10315.6	3414.07	10507.8	19610.8	12017.8	5053.7	5624.3	19406	19406	15626.9	22805.4	11438.3	17863.9	9710.3	11172.6	13244.7	21073.9	34266	34266	3909.1	10370.5	11586.7	7637.3	8839.4	2855.47
		23093	23093	16476.7	23592.2	13165.6	16564	10683.9	11231	12334.2	20055.9	38509	38509	3257.2	10942.8	6729.1	12543.3	11151.6	5905.87	14183	10732.7	7810	2685.73	26686.3	8627.3	2786.86	12859.4	19344.8	7522.16	7670.3	10373.3	22936	22936	16319.7	23435.2	13008.6	16407	10526.9	11074	12177.2	19898.9	38352	38352	3100.2	10785.8	6572.1	12386.3	10994.6	5748.87
		26341	26341	15056.2	25675.7	15095.7	15055.9	7569.9	9895.72	14617.6	18778.8	35344	35344	5520.5	12565.5	16913.4	11716.8	10197.3	3072.47	14446.3	10356	7826.77	1981.89	26025.1	13906.6	3566.41	8749.3	23629.8	10144.9	8171.8	9546.8	26184	26184	14899.2	25518.7	14938.7	14898.9	7412.9	9738.72	14460.6	18621.8	35187	35187	5363.5	12408.5	16756.4	11559.8	10040.3	2915.47
		21625	21625	16295.9	26199.7	11394.3	13588	7543.8	9989.66	15512.7	19979.7	38629	38629	3280.8	11443.6	8110.2	7892	12486.8	1825.64	14586.2	11244.1	8328.56	2946.66	26515.4	10141.2	3729.37	5862.1	21804	9770.68	8026	5722	21468	21468	16138.9	26042.7	11237.3	13431	7386.8	9832.66	15355.7	19822.7	38472	38472	3123.8	11286.6	7953.2	7735	12329.8	1668.64
		22562	22562	17827.5	30262.6	11170.6	12838.2	4463.6	9577.99	14035.2	18997.3	34623	34623	4422.8	11613.9	13297.8	8833.8	10375.9	3050.34	10805.6	10577.1	8203.98	4150.28	23539.2	12059.5	3540.88	6357.6	22610.4	9869.08	10344.4	6663.8	22405	22405	17670.5	30105.6	11013.6	12681.2	4306.6	9420.99	13878.2	18840.3	34466	34466	4265.8	11456.9	13140.8	8676.8	10218.9	2893.34
		24623	24623	18101.5	30767.6	12423.9	10276.4	6640.9	9582.17	11761.2	15909.2	39911	39911	3625.4	11321.7	15395	10970.2	7629.8	3322.12	9108.54	9069.3	8723.67	1798.64	22083.7	13430	2826.06	4988.2	21625.9	9119.61	9468	8800.2	24466	24466	17944.5	30610.6	12266.9	10119.4	6483.9	9425.17	11604.2	15752.2	39754	39754	3468.4	11164.7	15238	10813.2	7472.8	3165.12
		26560	26560	20216.6	31136.1	11367.2	8279.4	6861	12145.1	12236.7	17906.2	35184	35184	6221.6	12648.9	18052.4	9756.6	9679.9	3277.88	11804.6	9165.56	10661.4	1229.55	21525.8	12955.8	3976.1	7298.4	22155.4	11350.2	10343.2	7586.6	26403	26403	20059.6	30979.1	11210.2	8122.4	6704	11988.1	12079.7	17749.2	35027	35027	6064.6	12491.9	17895.4	9599.6	9522.9	3120.88
		25279	25279	18446.1	33900	10250.1	8589.7	6097.2	9465.54	17324.3	19719.6	40552	40552	4018	13505	20152.3	12002.6	9636.2	425.93	8516.59	8986.15	9988.33	1851.07	19861.8	13014.7	6041.69	6231.2	23049.8	7303	12127.1	9832.6	25122	25122	18289.1	33743	10093.1	8432.7	5940.2	9308.54	17167.3	19562.6	40395	40395	3861	13348	19995.3	11845.6	9479.2	268.93
		24061	24061	19127.3	32326.4	11801.1	9489	6159.8	12323.1	14922.4	22054.5	36266	36266	9654.5	14283.4	20415.3	10472.1	8349.6	396.52	10607.8	5069.2	9283.13	3546.22	19968.1	15222	5192.74	5168.6	20514.5	9687.69	10891.8	8302.1	23904	23904	18970.3	32169.4	11644.1	9332	6002.8	12166.1	14765.4	21897.5	36109	36109	9497.5	14126.4	20258.3	10315.1	8192.6	239.52
		21781	21781	21546.5	32046.8	12987.4	9995.6	6581.1	11329.6	15214.2	21645.5	40472	40472	7888.2	16897.5	21371.9	10083.2	7878.6	1978.55	9357.78	7244.73	11050.2	4753.08	23192.9	15980.6	5026	4136	19873.2	8553.87	14051.7	7913.2	21624	21624	21389.5	31889.8	12830.4	9838.6	6424.1	11172.6	15057.2	21488.5	40315	40315	7731.2	16740.5	21214.9	9926.2	7721.6	1821.55
		26654	26654	20193.3	29053.5	11309.6	9501.9	7064.2	7763.73	18178.1	23024.5	36105	36105	4499	16490	20957.1	13591.4	6382.8	2804.42	11120	8240.53	10093.5	6675.67	19826.5	12316.1	4279.38	4285.2	20271.4	10728.8	13605.7	11421.4	26497	26497	20036.3	28896.5	11152.6	9344.9	6907.2	7606.73	18021.1	22867.5	35948	35948	4342	16333	20800.1	13434.4	6225.8	2647.42
		24467	24467	19448.8	26382.8	11340.3	9741	9633.1	8556.41	17189	23286.6	34783	34783	9185.6	16050	25585.1	11403.3	8356	3221.89	11488.8	6327.06	5603.49	2220.89	20810.8	10076.8	4563.55	5178.5	20732.5	10483.9	12399.3	9233.3	24310	24310	19291.8	26225.8	11183.3	9584	9476.1	8399.41	17032	23129.6	34626	34626	9028.6	15893	25428.1	11246.3	8199	3064.89
	0 (center)	23874	23874	20350.9	27476.6	11168.5	11466	7086.2	7160.76	18835.4	24994	40071	40071	9846.5	14404	21936.9	10500.4	9575.5	3386.97	10479.1	6496.48	8900.12	4192.07	20443.4	12482.2	5701.11	5417	17982.9	9584.9	9362.2	8330.4	23717	23717	20193.9	27319.6	11011.5	11309	6929.2	7003.76	18678.4	24837	39914	39914	9689.5	14247	21779.9	10343.4	9418.5	3229.97
[truncated: 851 more columns]

## Sheet: Fig. 2c (sen1395)
Supplementary data set 2
corresponding Fig. 2c
sen1395
experiment 1	1 (pole)	13349	13187	19437	26781	17164	13037	7952	13349	10830	11577	6728	27218	14044	12171	5743	18702	12677	12888	12302	8542	10297	6149	16247	13891	8715	14644	33114	14749	31302	22184	11689	6604	12001	9482	10229	5380	25870	12696	10823	4395	17354	11329	11540	10954	7194	8949	4801	14899
		13661	10980	20034	26363	15343	11960	7947	13661	10916	8332	5724	24630	13843	9912	5965	21298	14543	15040	10826	6139	12023	7068	18762	15652	8805	16191	7157	19879	31101	20555	10612	6599	12313	9568	6984	4376	23282	12495	8564	4617	19950	13195	13692	9478	4791	10675	5720	17414
		12714	13059	15446	24545	15616	14068	6495	12714	10898	10329	6057	20634	12899	6050	7072	21335	11393	12462	11828	7794	13974	6145	18064	11595	8826	18574	34637	16845	33785	17401	12720	5147	11366	9550	8981	4709	19286	11551	4702	5724	19987	10045	11114	10480	6446	12626	4797	16716
		11634	11473	19165	21522	16317	13095	5825	11634	9867	7657	7251	20410	21016	10206	8941	20384	12003	12127	13236	10437	9132	7734	16760	17273	9448	19018	32732	18009	30981	18342	11747	4477	10286	8519	6309	5903	19062	19668	8858	7593	19036	10655	10779	11888	9089	7784	6386	15412
		13962	14036	17846	24547	11788	14101	6870	13962	9509	10121	5304	25032	13605	8469	6742	21976	13175	13917	10849	10359	10733	7748	16645	14735	9381	17640	26455	15971	4550	20710	12753	5522	12614	8161	8773	3956	23684	12257	7121	5394	20628	11827	12569	9501	9011	9385	6400	15297
		14555	10956	18939	22607	16983	12667	6241	14555	12154	10856	4578	23524	11732	8680	3676	22258	11529	15560	12368	11751	12499	7155	18202	16474	9662	18755	28634	13495	2455	16993	11319	4893	13207	10806	9508	3230	22176	10384	7332	2328	20910	10181	14212	11020	10403	11151	5807	16854
		15951	9325	16203	19070	9175	11623	4946	15951	10431	9833	4527	24355	15776	9725	6020	20285	11467	15929	12064	11663	9851	6331	15449	15845	11285	17921	30742	17336	9790	18583	10275	3598	14603	9083	8485	3179	23007	14428	8377	4672	18937	10119	14581	10716	10315	8503	4983	14101
		16354	10158	16280	24730	10582	9519	6188	16354	11070	8111	4270	24263	13392	7855	4581	20795	11916	15935	11463	11834	10663	8736	14865	16860	10676	18633	31556	18193	5588	18767	8171	4840	15006	9722	6763	2922	22915	12044	6507	3233	19447	10568	14587	10115	10486	9315	7388	13517
		16981	9998	16340	20702	15754	7087	5357	16981	8005	11435	3415	26531	13402	7175	6377	20747	13149	17590	12147	10689	11154	7324	14897	15848	11349	20719	30871	15502	8724	17568	5739	4009	15633	6657	10087	2067	25183	12054	5827	5029	19399	11801	16242	10799	9341	9806	5976	13549
		15776	10311	17879	20664	19884	8803	4100	15776	9454	13649	4536	30738	12067	8116	6047	17687	13684	13096	13533	8352	14041	8806	16030	13901	9020	19305	30940	15028	8179	21485	7455	2752	14428	8106	12301	3188	29390	10719	6768	4699	16339	12336	11748	12185	7004	12693	7458	14682
		17478	9285	17350	20760	17861	11953	5634	17478	11458	15522	5085	29415	11109	7662	7298	16198	13490	16940	15528	9606	15526	9189	17328	15133	9377	20512	31884	19554	9734	22477	10605	4286	16130	10110	14174	3737	28067	9761	6314	5950	14850	12142	15592	14180	8258	14178	7841	15980
		18059	11252	16889	19170	17722	10214	6298	18059	10722	14209	6033	29530	7182	10209	5130	15933	13683	17759	15742	11440	14076	7729	17340	13632	10033	21179	32056	20514	8488	19580	8866	4950	16711	9374	12861	4685	28182	5834	8861	3782	14585	12335	16411	14394	10092	12728	6381	15992
	0.5	18585	10303	16558	15002	6113	13126	5865	18585	9868	12725	4114	28693	10415	8840	8554	15990	14111	16342	13686	8138	24703	8796	12463	11553	8458	23971	31141	21775	9582	18774	11778	4517	17237	8520	11377	2766	27345	9067	7492	7206	14642	12763	14994	12338	6790	23355	7448	11115
		16573	8993	15083	16755	10479	11485	10480	16573	12318	15828	6344	26952	6728	9052	6149	16517	13142	15032	13627	8547	27288	8987	13486	32031	9175	26604	30639	21950	8512	18520	10137	9132	15225	10970	14480	4996	25604	5380	7704	4801	15169	11794	13684	12279	7199	25940	7639	12138
		17090	11192	12900	15002	10407	13603	6768	17090	10950	14526	4684	28458	10850	10083	3872	12384	12554	15505	14064	8069	25490	8737	14605	12438	9189	25014	28727	20085	6922	14408	12255	5420	15742	9602	13178	3336	27110	9502	8735	2524	11036	11206	14157	12716	6721	24142	7389	13257
		15254	8584	12371	13403	8148	14244	7526	15254	14083	11857	5007	27210	10362	10695	7076	10726	16842	14964	17509	7866	24214	7786	12042	13113	10627	22236	28007	19149	8374	13171	12896	6178	13906	12735	10509	3659	25862	9014	9347	5728	9378	15494	13616	16161	6518	22866	6438	10694
		15925	9453	13987	12687	6425	14351	8819	15925	12629	11189	5821	26639	11262	9118	8680	11686	15660	14811	20462	5792	27747	8131	12794	12126	9776	24280	31345	17801	8167	14351	13003	7471	14577	11281	9841	4473	25291	9914	7770	7332	10338	14312	13463	19114	4444	26399	6783	11446
		15979	12346	14120	10949	7455	15047	6191	15979	12456	12317	3694	27242	14089	8812	2682	8824	16056	15081	17036	8062	28159	7714	8258	11392	7466	30701	31313	19383	7729	12830	13699	4843	14631	11108	10969	2346	25894	12741	7464	1334	7476	14708	13733	15688	6714	26811	6366	6910
		17034	10119	11553	10107	8404	16984	4478	17034	11469	12728	4647	24490	15197	8617	7996	10155	15605	15081	15743	5124	24612	6342	4308	31101	8551	12204	30923	16030	8796	12260	15636	3130	15686	10121	11380	3299	23142	13849	7269	6648	8807	14257	13733	14395	3776	23264	4994	2960
		14378	9850	13086	11152	9225	17599	6713	14378	8931	12594	2762	25834	15385	7803	6946	11328	12417	11769	15723	3992	5127	5210	5778	33785	10041	13848	31097	12955	10676	13265	16251	5365	13030	7583	11246	1414	24486	14037	6455	5598	9980	11069	10421	14375	2644	3779	3862	4430
		17392	9245	15124	9422	7547	21325	8687	17392	12220	10015	6265	28146	16437	8881	7036	10374	13159	11593	13021	6649	7099	5744	6676	30981	10209	13454	33269	13856	11349	12026	19977	7339	16044	10872	8667	4917	26798	15089	7533	5688	9026	11811	10245	11673	5301	5751	4396	5328
		16699	10271	14360	9570	8212	25233	7924	16699	12815	11056	4818	29399	15931	8750	3826	11470	14076	13868	15077	5728	5470	8228	3395	9759	9666	12327	33232	12809	15742	14104	23885	6576	15351	11467	9708	3470	28051	14583	7402	2478	10122	12728	12520	13729	4380	4122	6880	2047
		16711	11272	14759	9423	7755	25594	7101	16711	12199	10890	2578	29940	18662	11186	6890	8168	15949	14660	16762	4952	6020	8958	5022	11123	10056	14135	33384	14237	13686	9119	24246	5753	15363	10851	9542	1230	28592	17314	9838	5542	6820	14601	13312	15414	3604	4672	7610	3674
		18618	10347	12961	12835	8227	28798	7406	18618	11023	11378	4271	31601	18461	11097	7707	8512	16014	15747	16242	2626	5578	8909	4015	13023	9314	12014	30608	8468	14111	11289	27450	6058	17270	9675	10030	2923	30253	17113	9749	6359	7164	14666	14399	14894	1278	4230	7561	2667
		17428	9790	33264	11616	6914	24947	5466	17428	10585	7538	4665	31232	21569	10737	5945	8014	14968	16107	15115	4437	6415	31998	3192	11356	7554	9266	28135	11376	13142	7226	23599	4118	16080	9237	6190	3317	29884	20221	9389	4597	6666	13620	14759	13767	3089	5067	30650	1844
	0 (center)	15433	7370	31302	10679	33264	26214	8457	15433	13191	6826	4752	29638	19425	11244	4743	10098	15364	15443	18599	5504	5400	32904	5239	10077	8780	8766	32896	11688	15929	10033	24866	7109	14085	11843	5478	3404	28290	18077	9896	3395	8750	14016	14095	17251	4156	4052	31556	3891
[truncated: 854 more columns]

## Sheet: Fig. 2c (chimera)
Supplementary data set 2
corresponding Fig. 2c
chimera
experiment 1	1 (pole)	38146	42869	43085	26010	27891	45702	23099	31276	19272	34826	34826	31064	23933	45702	25438	64590	55585	64197	64197	46405	64943	55395	57895	49101	53405	35850	39977	24958	48020	15677	20798	28975	16971	32525	32525	28763	21632	43401	23137	62289	53284	62896	62896	44104	62642	53094	55594	46800
		42411	45203	38720	25953	36212	44763	25329	26890	63743	38511	38511	35810	22899	44763	24339	60648	55990	57550	60636	45610	64137	56451	63428	50916	60946	33200	46280	26296	60916	20177	23028	24589	61442	36210	36210	33509	20598	42462	22038	58347	53689	55249	58335	43309	61836	54150	61127	48615
		40153	47803	36672	24021	45046	44369	24247	29642	22560	42572	42572	38111	19497	44369	21342	64197	55417	60648	64984	46613	61804	61839	62028	53557	63153	28253	50271	31150	64244	27921	21946	27341	20259	40271	40271	35810	17196	42068	19041	62896	53116	58347	62683	44312	59503	59538	59727	51256
		37805	42560	31092	21229	47818	44565	22862	28798	22940	42209	42209	36024	16184	44565	17188	63994	55395	62106	62017	46291	64130	61661	60428	52059	64685	27270	49925	31382	64050	37177	20561	26497	20639	39908	39908	33723	13883	42264	14887	61693	53094	59805	59716	43990	62829	59360	58127	49758
		32944	40249	26138	17522	48980	41421	19377	27533	24744	40702	40702	34066	13169	41421	14081	60240	54423	54634	63290	45810	57483	55961	44895	49381	53951	24315	47529	30425	60296	49219	17076	25232	22443	38401	38401	31765	10868	39120	11780	57939	52122	52333	60989	43509	55182	53660	42594	47080
		27985	33326	20763	13926	47876	36698	17789	25533	25181	36903	36903	28730	10804	36698	11111	50852	50292	54634	61908	44890	60581	57984	54634	48539	50672	21786	41583	32527	50908	52898	15488	23232	22880	34602	34602	26429	8503	34397	8810	48551	47991	52333	59607	42589	58280	55683	52333	46238
		22451	28038	17102	12519	44052	33936	16271	24076	23087	32017	32017	26543	8663	33936	9119	64197	45586	62125	64197	39741	56384	54238	47700	44544	62929	17958	37565	31537	41674	52001	13970	21775	20786	29716	29716	24242	6362	31635	6818	62896	43285	59824	62896	37440	54083	51937	45399	42243
		18045	23317	13548	11618	42169	30728	14757	22396	19854	27008	27008	23920	7935	30728	7373	64590	43770	64873	59739	34924	55973	51373	47355	40540	58583	15163	33250	32875	33623	56032	12456	20095	17553	24707	24707	21619	5634	28427	5072	62289	41469	62572	57438	32623	53672	49072	45054	38239
		13749	18199	11735	11287	36493	28127	13264	20904	17922	22637	22637	20878	7520	28127	7423	60648	40613	64881	55116	33340	59906	48376	44271	39203	53549	14704	28872	27907	28529	51895	10963	18603	15621	20336	20336	18577	5219	25826	5122	58347	38312	62580	52815	31039	57605	46075	41970	36902
		12078	14399	10157	11403	32522	23898	11649	19301	14279	18903	18903	17917	6820	23898	6872	52385	40770	63290	58468	30295	62394	43820	40654	37786	44390	13999	25323	29178	23368	42483	9348	17000	11978	16602	16602	15616	4519	21597	4571	50084	38469	60989	56167	27994	60093	41519	38353	35485
		10759	12300	10174	10865	30290	21377	11279	17493	13008	17302	17302	15790	5804	21377	5856	47992	39890	61908	48952	28712	54124	35884	36301	35848	39292	15546	21767	26420	22352	36486	8978	15192	10707	15001	15001	13489	3503	19076	3555	45691	37589	59607	46651	26411	51823	33583	34000	33547
		9825	10918	8450	10493	27559	20820	10589	15289	11576	16114	16114	12417	5715	20820	5460	43434	37579	60321	44193	28951	52055	32742	37060	32602	34193	16328	19659	23411	20811	33174	8288	12988	9275	13813	13813	10116	3414	18519	3159	41133	35278	58020	41892	26650	49754	30441	34759	30301
	0.5	9150	10280	9117	10491	26285	17672	11028	14599	10644	14081	14081	9044	6170	17672	6099	40574	37494	59739	42278	29377	48010	31061	31149	28770	34859	16913	19429	23066	24208	30527	8727	12298	8343	11780	11780	6743	3869	15371	3798	38273	35193	57438	39977	27076	45709	28760	28848	26469
		8321	9261	10211	9121	23220	16546	10905	13896	10800	13255	13255	8083	6260	16546	6223	41154	38126	55116	39921	29827	42911	31012	27890	29819	31435	15035	15065	19055	21796	25043	8604	11595	8499	10954	10954	5782	3959	14245	3922	38853	35825	52815	37620	27526	40610	28711	25589	27518
		9673	8820	8954	9728	21996	15021	11655	13297	10330	12412	12412	7405	5563	15021	6002	38967	37465	52502	40182	30993	40025	28819	27328	28286	30195	13868	14677	20200	20712	21684	9354	10996	8029	10111	10111	5104	3262	12720	3701	36666	35164	50201	37881	28692	37724	26518	25027	25985
		9560	8423	10045	9260	19095	15124	10479	13418	9490	11648	11648	7458	5361	15124	5238	40800	37882	51789	37566	29515	37580	25906	26063	27071	27699	13162	13342	21433	20340	20455	8178	11117	7189	9347	9347	5157	3060	12823	2937	38499	35581	49488	35265	27214	35279	23605	23762	24770
		8985	7765	8828	9803	18429	14403	11187	12980	9611	12742	12742	7143	5659	14403	5454	39774	34243	50652	36468	28364	33751	25096	26917	25495	26382	12334	13579	18333	21696	17512	8886	10679	7310	10441	10441	4842	3358	12102	3153	37473	31942	48351	34167	26063	31450	22795	24616	23194
		9020	8155	8940	10234	17742	13266	11297	12476	8338	12256	12256	6646	5049	13266	5520	37886	33384	48393	40264	31156	32316	26436	27384	24351	24445	11518	13997	18002	19197	14969	8996	10175	6037	9955	9955	4345	2748	10965	3219	35585	31083	46092	37963	28855	30015	24135	25083	22050
		8098	8512	9150	10259	16847	13089	10955	11403	6868	11787	11787	6801	4927	13089	4691	37700	33166	46409	37377	29644	28135	25983	27457	24576	22910	11330	14342	17478	19142	15116	8654	9102	4567	9486	9486	4500	2626	10788	2390	35399	30865	44108	35076	27343	25834	23682	25156	22275
		8614	9377	8478	9873	15954	12926	10215	11094	7525	10630	10630	6514	5083	12926	4917	38522	31485	46834	36217	28672	26663	27830	27900	23703	21067	11689	14414	16316	18473	13951	7914	8793	5224	8329	8329	4213	2782	10625	2616	36221	29184	44533	33916	26371	24362	25529	25599	21402
		8619	8982	8539	9851	15518	12062	10543	10100	7624	10237	10237	7505	5089	12062	4795	35856	31846	44227	35511	27311	22584	27270	27155	23768	22073	12301	15774	16808	17072	12168	8242	7799	5323	7936	7936	5204	2788	9761	2494	33555	29545	41926	33210	25010	20283	24969	24854	21467
		8419	9173	7654	10773	14981	12714	11283	8322	7249	11887	11887	7275	5287	12714	4934	35173	31688	46720	34555	26692	22617	25535	27253	24766	21919	12426	14979	14791	17646	12723	8982	6021	4948	9586	9586	4974	2986	10413	2633	32872	29387	44419	32254	24391	20316	23234	24952	22465
		9234	7839	7523	10637	13525	13590	10480	8541	6849	10231	10231	7952	4955	13590	4864	36973	29941	21714	33128	26535	21798	24550	26646	25754	19362	12007	14777	15734	18380	13592	8179	6240	4548	7930	7930	5651	2654	11289	2563	34672	27640	39413	30827	24234	19497	22249	24345	23453
		7996	8689	7745	10391	13571	13414	10308	8104	7224	11747	11747	7565	4968	13414	5223	35481	11464	23354	31946	26883	20890	23223	27437	24212	20725	12311	14794	14722	19312	12824	8007	5803	4923	9446	9446	5264	2667	11113	2922	33180	29163	41053	29645	24582	18589	20922	25136	21911
		8352	8750	8281	9971	13334	13754	9823	7061	6972	13322	13322	6961	5068	13754	5382	36933	11063	22020	30627	27328	22316	20709	25548	22475	21020	12041	15159	13425	17825	11950	7522	4760	4671	11021	11021	4660	2767	11453	3081	34632	28762	39719	28326	25027	20015	18408	23247	20174
	0 (center)	8274	8708	8185	10333	13826	11372	9410	7329	6777	13048	13048	6969	5335	11372	5530	37599	14430	21085	30723	27997	20923	20250	24904	22206	19330	11738	13759	15892	17943	10375	7109	5028	4476	10747	10747	4668	3034	9071	3229	35298	32129	38784	18422	25696	18622	17949	22603	19905
[truncated: 852 more columns]
