# Supplementary material for: Mechanisms of substrate recognition by a typhoid toxin secretion-associated muramidase
Source: eLife. 2020 Jan 20;9:e53473. doi: 10.7554/eLife.53473 (PMC6996933; doi:10.7554/eLife.53473)
Supplement: Figure 3—source data 1. [file elife-53473-fig3-data1.xlsx]

## Sheet: Fig. 3a
Supplementary data set 3
corresponding Fig. 3a
experiment 1	WT (CdtB-FLAG)	∆ttsA (CdtB-FLAG)	∆ttsA (CdtB-FLAG) +TtsA (N166D)	∆ttsA (CdtB-FLAG) +Sen1395	∆ttsA (CdtB-FLAG) +Sen1395 (D167N)
	0.8	0.02	0.03	0.03	0.37
	0.76	0.04	0.04	0.04	0.25
	0.74	0.01	0.02	0.05	0.34
	0.78	0.03	0.05	0.02	0.23
	0.84	0.01	0.1	0.07	0.33
	0.87	0.02	0.04	0.03	0.13
	0.89	0.01	0.02	0.05	0.23
	0.92	0.04	0.01	0.02	0.21
	0.94	0.05	0.05	0.07	0.34
	0.78	0.02	0.03	0.02	0.13
experiment 2
	0.86	0.06	0.07	0.06	0.27
	0.94	0.03	0.09	0.07	0.21
	0.93	0.06	0.04	0.02	0.18
	0.87	0.02	0.04	0.02	0.15
	0.9	0.01	0.02	0.07	0.14
	0.84	0.02	0.02	0.07	0.14
	0.87	0.02	0.04	0.07	0.24
	0.88	0.04	0.05	0.05	0.23
	0.79	0.01	0.03	0.02	0.15
	0.78	0.03	0.05	0.06	0.34
experiment 3
	0.92	0.05	0.04	0.01	0.25
	0.93	0.02	0.01	0.04	0.34
	0.92	0.05	0.03	0.03	0.21
	0.87	0.06	0.03	0.02	0.16
	0.88	0.02	0.05	0.01	0.17
	0.93	0.01	0.01	0.05	0.25
	0.91	0.02	0.02	0.05	0.32
	0.78	0.04	0.01	0.03	0.37
	0.86	0.05	0.03	0.05	0.31
	0.95	0.02	0.04	0.02	0.28

## Sheet: Fig. 3b WT (TtsA-Flag)
Supplementary data set 3
corresponding Fig. 3b
WT (TtsA-Flag)
experiment 1	1 (pole)	43745	26670	28551	46362	23759	31936	19932	35486	35486	31724	24593	46362	26098	65250	56245	65857	65857	47065	65603	56055	58555	49761	54065	36510	40637	25618	48680	16337	38862	43585	42393	25318	27199	45010	22407	30584	18580	34134	34134	30372	23241	45010	24746	63898	54893	64505	64505	45713
		39380	26613	36872	45423	25989	27550	64403	39171	39171	36470	23559	45423	24999	61308	56650	58210	61296	46270	64797	57111	64088	51576	61606	33860	46940	26956	61576	20837	43127	45919	38028	25261	35520	44071	24637	26198	63051	37819	37819	35118	22207	44071	23647	59956	55298	56858	59944	44918
		37332	24681	45706	45029	24907	30302	23220	43232	43232	38771	20157	45029	22002	65857	56077	61308	65644	47273	62464	62499	62688	54217	63813	28913	50931	31810	65904	28581	40869	48519	35980	23329	44354	43677	23555	28950	21868	41880	41880	37419	18805	43677	20650	64505	54725	59956	64292	45921
		31752	21889	48478	45225	23522	29458	23600	42869	42869	36684	16844	45225	17848	64654	56055	62766	62677	46951	65790	62321	61088	52719	65345	27930	50585	32042	64710	37837	38521	43276	30400	20537	47126	43873	22170	28106	22248	41517	41517	35332	15492	43873	16496	63302	54703	61414	61325	45599
		26798	18182	49640	42081	20037	28193	25404	41362	41362	34726	13829	42081	14741	60900	55083	55294	63950	46470	58143	56621	45555	50041	54611	24975	48189	31085	60956	49879	33660	40965	25446	16830	48288	40729	18685	26841	24052	40010	40010	33374	12477	40729	13389	59548	53731	53942	62598	45118
		21423	14586	48536	37358	18449	26193	25841	37563	37563	29390	11464	37358	11771	51512	50952	55294	62568	45550	61241	58644	55294	49199	51332	22446	42243	33187	51568	53558	28701	34042	20071	13234	47184	36006	17097	24841	24489	36211	36211	28038	10112	36006	10419	50160	49600	53942	61216	44198
		17762	13179	44712	34596	16931	24736	23747	32677	32677	27203	9323	34596	9779	65857	46246	62785	65857	40401	57044	54898	48360	45204	63589	18618	38225	32197	42334	52661	23167	28754	16410	11827	43360	33244	15579	23384	22395	31325	31325	25851	7971	33244	8427	64505	44894	61433	64505	39049
		14208	12278	42829	31388	15417	23056	20514	27668	27668	24580	8595	31388	8033	65250	44430	65533	60399	35584	56633	52033	48015	41200	59243	15823	33910	33535	34283	56692	18761	24033	12856	10926	41477	30036	14065	21704	19162	26316	26316	23228	7243	30036	6681	63898	43078	64181	59047	34232
		12395	11947	37153	28787	13924	21564	18582	23297	23297	21538	8180	28787	8083	61308	41273	65541	55776	34000	60566	49036	44931	39863	54209	15364	29532	28567	29189	52555	14465	18915	11043	10595	35801	27435	12572	20212	17230	21945	21945	20186	6828	27435	6731	59956	39921	64189	54424	32648
		10817	12063	33182	24558	12309	19961	14939	19563	19563	18577	7480	24558	7532	53045	41430	63950	59128	30955	63054	44480	41314	38446	45050	14659	25983	29838	24028	43143	12794	15115	9465	10711	31830	23206	10957	18609	13587	18211	18211	17225	6128	23206	6180	51693	40078	62598	57776	29603
		10834	11525	30950	22037	11939	18153	13668	17962	17962	16450	6464	22037	6516	48652	40550	62568	49612	29372	54784	36544	36961	36508	39952	16206	22427	27080	23012	37146	11475	13016	9482	10173	29598	20685	10587	16801	12316	16610	16610	15098	5112	20685	5164	47300	39198	61216	48260	28020
		9110	11153	28219	21480	11249	15949	12236	16774	16774	13077	6375	21480	6120	44094	38239	60981	44853	29611	52715	33402	37720	33262	34853	16988	20319	24071	21471	33834	10541	11634	7758	9801	26867	20128	9897	14597	10884	15422	15422	11725	5023	20128	4768	42742	36887	59629	43501	28259
	0.5	9777	11151	26945	18332	11688	15259	11304	14741	14741	9704	6830	18332	6759	41234	38154	60399	42938	30037	48670	31721	31809	29430	35519	17573	20089	23726	24868	31187	9866	10996	8425	9799	25593	16980	10336	13907	9952	13389	13389	8352	5478	16980	5407	39882	36802	59047	41586	28685
		10871	9781	23880	17206	11565	14556	11460	13915	13915	8743	6920	17206	6883	41814	38786	55776	40581	30487	43571	31672	28550	30479	32095	15695	15725	19715	22456	25703	9037	9977	9519	8429	22528	15854	10213	13204	10108	12563	12563	7391	5568	15854	5531	40462	37434	54424	39229	29135
		9614	10388	22656	15681	12315	13957	10990	13072	13072	8065	6223	15681	6662	39627	38125	53162	40842	31653	40685	29479	27988	28946	30855	14528	15337	20860	21372	22344	10389	9536	8262	9036	21304	14329	10963	12605	9638	11720	11720	6713	4871	14329	5310	38275	36773	51810	39490	30301
		10705	9920	19755	15784	11139	14078	10150	12308	12308	8118	6021	15784	5898	41460	38542	52449	38226	30175	38240	26566	26723	27731	28359	13822	14002	22093	21000	21115	10276	9139	9353	8568	18403	14432	9787	12726	8798	10956	10956	6766	4669	14432	4546	40108	37190	51097	36874	28823
		9488	10463	19089	15063	11847	13640	10271	13402	13402	7803	6319	15063	6114	40434	34903	51312	37128	29024	34411	25756	27577	26155	27042	12994	14239	18993	22356	18172	9701	8481	8136	9111	17737	13711	10495	12288	8919	12050	12050	6451	4967	13711	4762	39082	33551	49960	35776	27672
		9600	10894	18402	13926	11957	13136	8998	12916	12916	7306	5709	13926	6180	38546	34044	49053	40924	31816	32976	27096	28044	25011	25105	12178	14657	18662	19857	15629	9736	8871	8248	9542	17050	12574	10605	11784	7646	11564	11564	5954	4357	12574	4828	37194	32692	47701	39572	30464
		9810	10919	17507	13749	11615	12063	7528	12447	12447	7461	5587	13749	5351	38360	33826	47069	38037	30304	28795	26643	28117	25236	23570	11990	15002	18138	19802	15776	8814	9228	8458	9567	16155	12397	10263	10711	6176	11095	11095	6109	4235	12397	3999	37008	32474	45717	36685	28952
		9138	10533	16614	13586	10875	11754	8185	11290	11290	7174	5743	13586	5577	39182	32145	47494	36877	29332	27323	28490	28560	24363	21727	12349	15074	16976	19133	14611	9330	10093	7786	9181	15262	12234	9523	10402	6833	9938	9938	5822	4391	12234	4225	37830	30793	46142	35525	27980
		9199	10511	16178	12722	11203	10760	8284	10897	10897	8165	5749	12722	5455	36516	32506	44887	36171	27971	23244	27930	27815	24428	22733	12961	16434	17468	17732	12828	9335	9698	7847	9159	14826	11370	9851	9408	6932	9545	9545	6813	4397	11370	4103	35164	31154	43535	34819	26619
		8314	11433	15641	13374	11943	8982	7909	12547	12547	7935	5947	13374	5594	35833	32348	47380	35215	27352	23277	26195	27913	25426	22579	13086	15639	15451	18306	13383	9135	9889	6962	10081	14289	12022	10591	7630	6557	11195	11195	6583	4595	12022	4242	34481	30996	46028	33863	26000
		8183	11297	14185	14250	11140	9201	7509	10891	10891	8612	5615	14250	5524	37633	30601	42374	33788	27195	22458	25210	27306	26414	20022	12667	15437	16394	19040	14252	9950	8555	6831	9945	12833	12898	9788	7849	6157	9539	9539	7260	4263	12898	4172	36281	29249	41022	32436	25843
		8405	11051	14231	14074	10968	8764	7884	12407	12407	8225	5628	14074	5883	36141	32124	44014	32606	27543	21550	23883	28097	24872	21385	12971	15454	15382	19972	13484	8712	9405	7053	9699	12879	12722	9616	7412	6532	11055	11055	6873	4276	12722	4531	34789	30772	42662	31254	26191
		8941	10631	13994	14414	10483	7721	7632	13982	13982	7621	5728	14414	6042	37593	31723	42680	31287	27988	22976	21369	26208	23135	21680	12701	15819	14085	18485	12610	9068	9466	7589	9279	12642	13062	9131	6369	6280	12630	12630	6269	4376	13062	4690	36241	30371	41328	29935	26636
	0 (center)	8845	10993	14486	12032	10070	7989	7437	13708	13708	7629	5995	12032	6190	38259	35090	41745	31383	28657	21583	20910	25564	22866	19990	12398	14419	16552	18603	11035	8990	9424	7493	9641	13134	10680	8718	6637	6085	12356	12356	6277	4643	10680	4838	36907	33738	40393	30031	27305
[truncated: 854 more columns]

## Sheet: Fig. 3b ttsAN166D (TtsA-Flag)
Supplementary data set 3
corresponding Fig. 3b
ttsA N166D (TtsA-Flag)
experiment 1	1 (pole)	43930.4	44972	34372	44294	44290	46234	44387	44136	47255	43134	45234	46477	45653	45732	45672	41005	13760	16611	45683	43453	48356	48733	47230	27476	39424	40912	42090	21943	43075.4	44213.1	42578	43620	33020	42942	42938	44882	43035	42784	45903	41782	43882	45125	44301	44380	44320	39653	12408	15259
		42465	43678	38072.3	44788	44926.6	45723	43799	44700.7	43456	42376	41287	42111	42368	44635.2	44635.2	41682.6	16916.9	16711.8	44682.9	44155.9	44923	47544	46734	36144.1	39952.4	36745.8	37474.4	26088.7	43111	43670	41113	42326	36720	43436	43575	44371	42447	43349	42104	41024	39935	40759	41016	43283	43283	40331	15565	15360
		42165	41866.7	39116.3	43217	43678	44782	42133	44871	42344	41967	40378	42199	41342	38619	38619	40661.3	21644.3	14346.1	40903	43283	43676	46892	43256	39769.3	40765.6	34782.5	35104.2	28758.7	44323	42676	40813	40515	37764	41865	42326	43430	40781	43519	40992	40615	39026	40847	39990	37267	37267	39309	20292	12994
		41347	39393	38869.7	41778	43897	43287	38447.7	44972	42197	40143	44266	43523	40166	33225	34413	38152.3	22862.2	12498.2	34713.7	41495	38675	45186	44399	41940.2	36897.4	32987.6	32979	31476.5	44667.6	41900	39995	38041	37518	40426	42545	41935	37096	43620	40845	38791	42914	42171	38814	31873	33061	36800	21510	11146
		41211	33216.1	40602.7	40985	44921.7	44855.8	32111.8	44853.8	41211	44390.6	42455	43887	44004	28825	28825	38581.3	23419.6	11084.1	28691.8	36590.7	39123	44229.7	43411	39366.7	35784.8	31097.4	32147.5	26517	44856.8	40267	39859	31864	39251	39633	43570	43504	30760	43502	39859	43039	41103	42535	42652	27473	27473	37229	22068	9732
		40954	31834.8	37983.5	40146	42355	42258.3	26147.7	42577.5	39922	42986	44011.5	34728	40037	23283.4	23283.4	37357.2	21632.1	11196.4	24648.3	32748.7	44816.8	38106.3	44298	35885.8	31635.3	29899.8	29408.9	21584.9	30110	39086	39602	30483	36632	38794	41003	40906	24796	41226	38570	41634	42660	33376	38685	21931	21931	36005	20280	9844
		39643	29569.1	33688.4	39455.5	35701.4	37507.2	20146.2	35870	40211	43888.6	39572.1	29630	34399.5	19555.9	19555.9	34372.1	21367.7	11125.9	21343.1	28538.3	41437.3	37337	44620.7	28392.5	29580.7	28839.2	28932.5	16962.4	38044.5	38009	38291	28217	32336	38104	34349	36155	18794	34518	38859	42537	38220	28278	33048	18204	18204	33020	20016	9774
		38687.1	28398.2	29250.3	37364.2	29195.7	31928.7	15662.5	34063.4	39638.4	42201.9	34243.7	24531	27484.9	17379.1	17379.1	32583.3	21376.9	9287.8	20698.1	26623	37798.9	33465.5	41287.8	26116	26761.7	29717.7	27169.2	11971.5	37521	35909.9	37335	27046	27898	36012	27844	30577	14311	32711	38286	40850	32892	23179	26133	16027	16027	31231	20025	7936
		33331.8	25046.3	26313.6	38541	27148.3	27213.7	12867.7	26823.9	32559.9	36525.3	32608.1	25197	24534.4	16386.7	16386.7	31010.1	18513	8424.4	19226.1	25892.4	33150.9	32124.5	38460.4	24658.9	26103.1	31387	22796	11217.7	37096	28902	31980	23694	24962	37189	25796	25862	11516	25472	31208	35173	31256	23845	23182	15035	15035	29658	17161	7072
		29928.7	24694.9	23364.3	34908.9	21681.6	25201.8	9149.3	21765	28929.2	32528.8	30827.1	21773	20189.2	16705	16705	28466.1	15774	5969.7	17367.4	22342.3	27898.5	26129	33086.4	23263.7	26149.3	30384.7	23110.1	9296.2	34555.8	22569.9	28577	23343	22012	33557	20330	23850	7797	20413	27577	31177	29475	20421	18837	15353	15353	27114	14422	4618
		25980.1	23945.6	22016.2	31687.5	20586.5	23016.2	8176.8	18861.8	23986.2	30479.2	28601.6	20533	18104.5	15981.5	15981.5	25079.1	14553.8	4456.3	17583.9	19902.5	24467.5	25803.4	26308.6	21494.5	22212.6	29017.5	22163.5	7735.2	28171.9	18688.9	24628	22594	20664	30336	19235	21664	6825	17510	22634	29127	27250	19181	16753	14630	14630	23727	13202	3104
		25528.7	22750.7	22291.3	32923.2	19812.9	22301.4	6686.9	15655	19374.5	26970.1	27540.6	18037	16658.4	16182.5	16182.5	23646.3	13619.6	3898.1	14539	19662	21105.6	20608.6	23056.9	19945.5	20369.1	29416.6	18970.1	7060.2	25107.9	13994.2	24177	21399	20939	31571	18461	20949	5335	14303	18023	25618	26189	16685	15306	14831	14831	22294	12268	2546
	0.5	24461.8	21991.7	21575.5	32434.5	20258.5	22316	5634.6	14245.7	17830.4	23063.5	24290.3	16720	14072.4	15067.2	15067.2	23861	13248.7	2270.3	12063.2	18316.9	19872	19135	21210	18662.2	18149.9	27285.6	17936.5	8265.8	19711.8	9482.5	23110	20640	20224	31083	18907	20964	4283	12894	16478	21712	22938	15368	12720	13715	13715	22509	11897	918
		24409.3	20948.6	22582.1	30783.9	20839.4	22264.6	5244.9	13658	16613.7	20149.1	21751.5	14783	14635	15147.4	15147.4	26364.7	11795.3	2710.5	11876.8	16813	18183.1	16567	20738.9	18542.8	16319.3	24331.6	15532.4	7338.3	17203	6657	23057	19597	21230	29432	19487	20913	3893	12306	15262	18797	20400	13431	13283	13795	13795	25013	10443	1359
		11811	21365	21267.2	29370.2	19923.9	22238.4	4590.9	10255.3	15781.3	16922.2	20196.6	13248	13113	14949.8	14949.8	25853.2	10606.9	1471.3	12675.5	13873.7	16329.5	15075.9	18953.4	12985.1	16546.3	24484.4	13520	8155.9	15881.4	6005	10459	20013	19915	28018	18572	20886	3239	8903	14429	15570	18845	11896	11761	13598	13598	24501	9255	119
		10219.2	22419.7	22724.7	27317.8	21595.3	19932.5	4401.4	9572.8	16195.8	14797.5	20636.5	11405	15071.7	15419.8	15419.8	24382.1	10281.6	908.1	12855.8	14222.8	16169.4	17020.1	16512.6	13852.3	17070.8	23427.8	14067.1	9131.2	13504	5935.9	8867	21068	21373	25966	20243	18581	3049	8221	14844	13446	19285	10053	13720	14068	14068	23030	8930	-444
		11263.5	21426.1	22127.5	27274	19947.1	19478.8	4305.7	8766.3	16036.5	10903.1	21540.9	12411	13950.1	17854.3	17854.3	25317.5	8747.1	1538.3	13136.6	13968.8	15851.9	16387	15799.4	11949.4	16147.2	20759	12799	8704.4	11186.3	5375.5	9912	20074	20776	25922	18595	18127	2954	7414	14685	9551	20189	11059	12598	16502	16502	23966	7395	186
		11427.4	21423.2	23432	28016.6	19978.2	19980.3	4043.6	9003.2	14560.5	11700.5	21376.5	12257	11986.9	16083.5	16083.5	26109.6	9365	1542.4	13350.9	12915.5	15155	16141.7	17464	12698.3	15895.8	21419.9	10741.1	10543.8	9689.4	4728.1	10075	20071	22080	26665	18626	18628	2692	7651	13209	10349	20025	10905	10635	14732	14732	24758	8013	190
		11612.1	21491	20741.4	27560.2	18900.8	20346	4598.2	5779	14728.9	10764.5	20440.3	9700	14359.1	19432	19432	25005.9	6942	936.2	14517.6	14643.3	16428.8	17039.8	15834.5	13858.6	15577.3	21622.7	8405.8	9619.6	7400.6	4233.4	10260	20139	19389	26208	17549	18994	3246	4427	13377	9413	19088	8348	13007	18080	18080	23654	5590	-416
		13849.9	21353.8	19357.2	25780.6	18222.8	18204.9	4751.7	6824.9	14721.7	10989.5	19333.3	11063	14337.1	19490	19490	25516.6	5702.3	225	14008	15538.3	14307.4	16209.5	18486.6	13941.8	15303.3	20759.4	7586.8	11350.5	7933.5	6849.8	12498	20002	18005	24429	16871	16853	3400	5473	13370	9638	17981	9711	12985	18138	18138	24165	4350	-1577
		14127.4	21488.7	17921.6	25933.5	18540.6	17334	3547	6888.8	13282.2	11792.6	19893.2	11358	14597	18595	18595	27589.8	4789.5	586.4	12660.8	16102.7	14894.9	16201.7	17129.2	15273.6	15594.8	18951.5	7421	11029.5	6323.4	5637.3	12775	20137	16570	24582	17189	15982	2195	5537	11930	10441	18541	10006	13245	17243	17243	26238	3438	-1938
		14673.4	21596.7	16060.6	25137.1	19072.5	17036.5	3314	6359.5	13075	10555.3	20697.8	9668	15563.9	18709	18709	25882.4	3760.9	43.7	12809.1	13310.5	12081.9	16578.7	15805.7	15640.2	15736.7	19191.6	6392.9	12375.2	6499.5	5622.7	13321	20245	14709	23785	17721	15685	1962	5008	11723	9203	19346	8316	14212	17357	17357	24530	2409	-1308
		15061	21468.1	16208.8	27204.5	18690.5	17600.2	3364.5	5563.7	13630.8	9726.6	20593.3	10071	14997.3	20151	20151	24706.6	3351.6	153.1	12590	12743.4	12378.6	17373	15055	13457.9	13250.3	19053	5147	10997.7	6376.3	5960.9	13709	20116	14857	25853	17339	16248	2013	4212	12279	8375	19241	8719	13645	18799	18799	23355	2000	-1199
		15687.9	22357.4	16211.5	25032.4	19437	18005.1	5529.4	4628.8	12577.1	11153	21472.3	10939	14190.6	20339.1	20339.1	22576.2	2542.3	542	10321.1	12391.6	10974.2	15625.5	13377.5	12598	13220.1	19899.9	4493.4	11300.8	5309.2	6802.3	14336	21005	14860	23680	18085	16653	4177	3277	11225	9801	20120	9587	12839	18987	18987	21224	1190	-1894
		11554.5	22690.5	16830.7	23322	20888.9	16379.9	4832.3	5551.3	11582.3	10744.8	20655.5	11497	13185.3	19146.2	19146.2	22769.3	2336.8	364.4	9723	9633.1	10607.3	15255.5	10872.1	13524.1	12768.7	19931.6	3113	12299.7	5661.7	6211.4	10203	21339	15479	21970	19537	15028	3480	4199	10230	9393	19304	10145	11833	17794	17794	21417	985	-1716
	0 (center)	11993	23965.7	18258.5	22663.5	23800.2	17442.2	3431	4988	12378.5	10584.2	20770	13125	13632.7	19790.1	19790.1	19649	2041.7	41.6	10078.4	7301.3	10231.5	14094.6	10672.4	11138.6	10622.7	20214.2	2645.3	10440.7	5484.9	4684.8	10641	22614	16907	21312	22448	16090	2079	3636	11027	9232	19418	11773	12281	18438	18438	18297	690	-1394
[truncated: 852 more columns]

## Sheet: Fig. 3d (WT)
Supplementary data set 3
corresponding Fig. 3d
WT
experiment 1	1 (pole)	22749	34121	29897	26387	27399	45503	20359	58788	16810	28311	41968	15580	52881	60481	52981	59325	53702	23727	57302	52469	59636	23761	47333	37755	49150	58593	44225	32192	36319	21300	21326	32698	28474	24964	25976	44080	18936	57365	15387	26888	40545	14157	51458	59058	51558	57902	52279	22304
		28369	38401	35542	32816	37568	54090	27924	61024	24492	36404	46310	22053	57864	57581	57281	57145	57841	27892	58014	58563	54764	29509	58407	41929	48309	58554	48860	29542	42622	22638	26946	36978	34119	31393	36145	52667	26501	59601	23069	34981	44887	20630	56441	56158	55858	55722	56418	26469
		30585	45678	38258	32373	46997	59860	32649	58370	30893	41848	52800	24840	53705	56569	51819	56473	58593	31242	49977	60709	56939	32317	58593	46339	47640	58575	48922	24595	46613	27492	29162	44255	36835	30950	45574	58437	31226	56947	29470	40425	51377	23417	52282	55146	50396	55050	57170	29819
		30333	51753	35965	28539	57769	60454	34956	59293	34657	42859	58485	25737	52523	56314	44953	57823	58593	30663	58485	58593	58593	32978	58485	48269	44737	57543	48365	23612	46267	27724	28910	50330	34542	27116	56346	59031	33533	57870	33234	41436	57062	24314	51100	54891	43530	56400	57170	29240
		28205	52721	33061	24505	61148	58563	36298	60709	29323	43448	54764	27821	52243	57860	39154	56939	54964	25262	57122	58552	58575	32898	58593	48656	43205	56578	43319	20657	43871	26767	26782	51298	31638	23082	59725	57140	34875	59286	27900	42025	53341	26398	50820	56437	37731	55516	53541	23839
		24341	47567	27827	20824	57135	56023	30581	55151	28174	45865	53705	28409	58593	54018	33920	50282	45580	19707	54018	58593	58205	31685	54964	44924	35949	54215	37263	18128	37925	28869	22918	46144	26404	19401	55712	54600	29158	53728	26751	44442	52282	26986	57170	52595	32497	48859	44157	18284
		18059	41952	24191	16251	60361	51164	25352	49977	24950	47364	52523	26588	57122	47522	33388	45545	38206	15082	57304	58290	48923	32624	56317	42646	30646	50785	34256	14300	33907	27879	16636	40529	22768	14828	58938	49741	23929	48554	23527	45941	51100	25165	55699	46099	31965	44122	36783	13659
		14603	38823	19212	14330	60469	44722	22667	41653	19890	44333	52243	24752	52131	45414	32782	43308	32866	12980	51466	56317	45441	33671	56524	37933	27658	46873	29383	11505	29592	29217	13180	37400	17789	12907	59046	43299	21244	40230	18467	42910	50820	23329	50708	43991	31359	41885	31443	11557
		13287	33861	16899	11013	60623	41868	19114	34744	16599	40762	45038	23428	49229	41504	32203	41787	27132	12130	45026	52800	40393	32342	58593	30715	25533	44423	27118	11046	25214	24249	11864	32438	15476	9590	59200	40445	17691	33321	15176	39339	43615	22005	47806	40081	30780	40364	25709	10707
		9126	28815	14309	11128	58290	38728	13678	30003	14038	40360	42948	22535	45134	39934	32967	42069	26558	12117	42703	58035	37146	32887	60709	28196	26336	41356	26609	10341	21665	25520	7703	27392	12886	9705	56867	37305	12255	28580	12615	38937	41525	21112	43711	38511	31544	40646	25135	10694
		9685	24827	11543	11024	49709	35732	11827	27199	12036	39359	43042	21646	42611	36329	32442	44695	25524	11965	37557	54982	34930	31615	55151	26333	24322	40201	26293	11888	18109	22762	8262	23404	10120	9601	48286	34309	10404	25776	10613	37936	41619	20223	41188	34906	31019	43272	24101	10542
		9101	25045	8445	10088	45446	34104	11612	24315	11385	35118	37470	22260	40982	35459	32934	48014	24586	13466	35638	55113	34859	30465	49977	27553	25016	36835	23324	12670	16001	19753	7678	23622	7022	8665	44023	32681	10189	22892	9962	33695	36047	20837	39559	34036	31511	46591	23163	12043
	0.5	6757	25889	7316	10491	39343	30402	9965	24571	11003	34587	35598	21597	38115	34565	31931	52524	23452	13879	35031	58507	34316	28961	58593	24288	25436	36440	22298	13255	15771	19408	5334	24466	5893	9068	37920	28979	8542	23148	9580	33164	34175	20174	36692	33142	30508	51101	22029	12456
		7556	24018	5615	8636	34005	29677	9671	23450	9655	29353	32179	22939	34710	35244	32808	56134	23645	11876	32994	58593	34392	27780	56317	24951	26938	34340	23733	11377	11407	15397	6133	22595	4192	7213	32582	28254	8248	22027	8232	27930	30756	21516	33287	33821	31385	54711	22222	10453
		8170	25240	4460	9140	28904	28785	9970	21834	9799	27315	27808	22518	35100	36844	34504	56317	25128	12683	30759	57860	32393	25146	56524	25366	23120	33457	24556	10210	11019	16542	6747	23817	3037	7717	27481	27362	8547	20411	8376	25892	26385	21095	33677	35421	33081	54894	23705	11260
		7812	24814	4226	8125	24577	27957	8388	21894	8995	23783	25099	21839	33932	37448	33571	56524	23380	11214	30259	58593	33871	23176	55382	26696	22046	31499	27114	9504	9684	17775	6389	23391	2803	6702	23154	26534	6965	20471	7572	22360	23676	20416	32509	36025	32148	55101	21957	9791
		9228	24453	4098	8369	20371	27885	8620	20712	9103	21747	23300	21627	35886	37975	38129	55478	22282	9115	30441	58593	30967	21435	50564	26687	21518	28779	27872	8676	9921	14675	7805	23030	2675	6946	18948	26462	7197	19289	7680	20324	21877	20204	34463	36552	36706	54055	20859	7692
		10526	23161	3986	9506	17197	26129	3701	16872	9156	20429	21491	20804	34560	36276	37965	50667	23004	8801	29176	58593	33272	20430	46048	23961	21764	27693	27224	7860	10339	14344	9103	21738	2563	8083	15774	24706	2278	15449	7733	19006	20068	19381	33137	34853	36542	49244	21581	7378
		11020	23213	3380	7817	15815	25462	3506	16955	9374	19044	17833	20297	35004	33840	39265	47605	22731	8025	25443	57966	32773	18644	41597	22482	21520	26619	26857	7672	10684	13820	9597	21790	1957	6394	14392	24039	2083	15532	7951	17621	16410	18874	33581	32417	37842	46182	21308	6602
		11459	21235	3554	6971	11311	23553	2921	16108	10942	19896	16418	19884	32613	31355	41565	43342	22628	7947	23498	38229	31342	16583	41049	21892	21742	22953	25683	8031	10756	12658	10036	19812	2131	5548	9888	22130	1498	14685	9519	18473	14995	18461	31190	29932	40142	41919	21205	6524
		10253	20601	3066	8202	10920	21655	3842	17032	11968	18523	14617	16573	31899	27542	37480	40061	23431	8342	23582	38392	31589	15946	38979	21342	22595	23327	23044	8643	12116	13150	8830	19178	1643	6779	9497	20232	2419	15609	10545	17100	13194	15150	30476	26119	36057	38638	22008	6919
		9562	20923	3005	6510	10202	20816	4223	14454	14076	16528	14619	16674	29848	25147	37625	37011	24478	6523	23379	38094	31409	15336	39908	21872	22433	21197	20012	8768	11321	11133	8139	19500	1582	5087	8779	19393	2800	13031	12653	15105	13196	15251	28425	23724	36202	35588	23055	5100
		9850	21055	3701	6824	8483	18816	5985	14232	15847	17206	15592	16300	27391	24578	36479	36151	26747	6046	21488	28591	32812	15455	41479	22367	24455	23150	22681	8349	11119	12076	8427	19632	2278	5401	7060	17393	4562	12809	14424	15783	14169	14877	25968	23155	35056	34728	25324	4623
		9620	22402	3506	6877	7312	17389	2516	14942	15362	17329	14556	14990	24491	24870	33195	33583	25370	6788	21661	28549	13172	15949	24499	22758	22864	21593	19175	8653	11136	11064	8197	20979	2083	5454	5889	15966	1093	13519	13939	15906	13133	13567	23068	23447	31772	32160	23947	5365
		10990	23897	2921	6043	7799	16610	2731	14277	12203	17513	14974	15281	22499	27090	31854	33538	26227	7732	21509	27168	12418	15934	26179	23810	22687	21793	19423	8383	11501	9767	9567	22474	1498	4620	6376	15187	1308	12854	10780	16090	13551	13858	21076	25667	30431	32115	24804	6309
	0 (center)	12576	24896	3842	6892	8326	16665	3272	14653	13201	18094	13123	15646	23988	30667	29340	32763	8288	6679	9784	7861	14052	16435	25196	24623	23169	24125	18355	8080	10101	12234	11153	23473	2419	5469	6903	15242	1849	13230	11778	16671	11700	14223	22565	29244	27917	31340	6865	5256
[truncated: 854 more columns]

## Sheet: Fig. 3d (ttsA)
Supplementary data set 3
corresponding Fig. 3d
ΔttsA
experiment 1	1 (pole)	25279	25279	18813	29934	5943	10192	22406	10442	3382	6600	21644	21644	2296	16797	11950	10067	8224	2937	7664	6181	1294	68	19922	15836	373	9707	8625	5300	3578	7897	25122	25122	18656	29777	5786	10035	22249	10285	3225	6443	21487	21487	2139	16640	11793	9910	8067	2780
		25123	25123	19503.1	26189.8	5562.06	12800.4	23610.4	8966.56	8708.3	10921.2	22726	22726	6113.5	16401.1	14371.4	9553.6	9825.2	5014.41	10762.8	5285.68	8284.83	4191.27	17306.6	18087	2565.56	13299.1	12917.4	6556.73	4599.8	7383.6	24966	24966	19346.1	26032.8	5405.06	12643.4	23453.4	8809.56	8551.3	10764.2	22569	22569	5956.5	16244.1	14214.4	9396.6	9668.2	4857.41
		19875	19875	19223.6	25864.8	5591.75	17635.3	26604	8491.22	8602.4	17011	24408	24408	7079	14631.6	15268.6	5083.2	10664.5	3155.13	11488.5	5289.02	10136.8	4736.35	23122.1	15161.6	4422.24	6368.4	14474.7	5520.54	5721.8	2913.2	19718	19718	19066.6	25707.8	5434.75	17478.3	26447	8334.22	8445.4	16854	24251	24251	6922	14474.6	15111.6	4926.2	10507.5	2998.13
		25935	25935	15533.7	26597.9	6537.54	18848.8	25941.3	8098.75	8217.9	20165.4	22686	22686	4867.2	18374.8	18538.7	9434	9103.9	2245.43	13873.7	5908.03	10764.4	1792.63	24418.5	15020.3	4000.81	10811.8	13744.1	5194.96	4437.9	7264	25778	25778	15376.7	26440.9	6380.54	18691.8	25784.3	7941.75	8060.9	20008.4	22529	22529	4710.2	18217.8	18381.7	9277	8946.9	2088.43
		21531	21531	17433.5	21747.7	7686.24	21575.3	25000.3	7404.64	9275.8	22087	22365	22365	3120.8	15227.2	18285.9	8290.3	8923.7	3905.9	15221.7	7095.7	7646.97	3229.97	22210.6	14606.5	1173.89	7562.2	14677.9	5213.36	6294.3	6120.3	21374	21374	17276.5	21590.7	7529.24	21418.3	24843.3	7247.64	9118.8	21930	22208	22208	2963.8	15070.2	18128.9	8133.3	8766.7	3748.9
		22655	22655	18658.9	22285	7371.24	21392.3	21277.3	8381.84	12227.9	21875.7	22565	22565	5220	16647	17712	8969.6	7437	4105.83	14909.8	7784.72	6964.15	2919.9	22370.5	10971.9	3095.97	8584.7	14481.2	6023.6	7030.1	6799.6	22498	22498	18501.9	22128	7214.24	21235.3	21120.3	8224.84	12070.9	21718.7	22408	22408	5063	16490	17555	8812.6	7280	3948.83
		23155	23155	17172.3	24775.9	9383.92	23864.7	16714.9	6837.23	10320.9	20195.9	27292	27292	6413.8	11373	13111.3	7497.9	7056.1	3241.49	17861.2	8092.22	7036.32	3876.62	22959.4	10421.5	4612	7320.4	17119	5466.51	5561	5327.9	22998	22998	17015.3	24618.9	9226.92	23707.7	16557.9	6680.23	10163.9	20038.9	27135	27135	6256.8	11216	12954.3	7340.9	6899.1	3084.49
		21843	21843	15383.2	22872	7649.34	25170	13248.8	8396.53	7961.8	17107.4	32380	32380	7939.6	17277.4	15742.4	6758.8	5133.3	4213.58	17020.4	8302.14	8518.68	6703.98	23361.3	13723.8	4124.26	10090.3	15052.5	7686.73	7063.8	4588.8	21686	21686	15226.2	22715	7492.34	25013	13091.8	8239.53	7804.8	16950.4	32223	32223	7782.6	17120.4	15585.4	6601.8	4976.3	4056.58
		23061	23061	15761.7	24984.9	7019.57	26198.6	11848.4	7456.34	9556.3	18874.9	31218	31218	8160	16461.9	18650.1	12608.4	7704.2	3686.3	17576.3	8969.06	5797.97	4733.2	21571.8	11564.2	3880.57	8471.5	13687.5	7622.24	7286.5	10438.4	22904	22904	15604.7	24827.9	6862.57	26041.6	11691.4	7299.34	9399.3	18717.9	31061	31061	8003	16304.9	18493.1	12451.4	7547.2	3529.3
		24155	24155	16893.7	24619.2	9398.43	27539.6	9971.7	8241.85	9627.8	19644.2	36145	36145	6354	15939.2	13186	7737	10512.8	3455.46	16104.1	11083.1	8258.22	3547.43	19774.2	10521.2	969.98	10128.3	13707.6	10539.8	7111.6	5567	23998	23998	16736.7	24462.2	9241.43	27382.6	9814.7	8084.85	9470.8	19487.2	35988	35988	6197	15782.2	13029	7580	10355.8	3298.46
		17782	17782	20275.1	23361.7	9489.35	22592.7	8817.8	7184.82	10278.6	23106.3	26972	26972	10307	18738.2	9193.6	8476.4	8644.7	3733.17	14944.6	12146.2	8103.29	2369.96	20900.6	12380.8	5307.81	8009.8	15360.9	11759.5	9559.8	6306.4	17625	17625	20118.1	23204.7	9332.35	22435.7	8660.8	7027.82	10121.6	22949.3	26815	26815	10150	18581.2	9036.6	8319.4	8487.7	3576.17
		22249	22249	20305	24895	9584.71	21811.6	8799.6	8746.47	10014.9	24603.9	25890	25890	4923.6	16276.5	8820.9	7923.4	7526.8	3736.21	16044.2	10197	7801.75	5337.44	22114.2	13946.6	4113	11853.3	15342.4	9338.8	9433.3	5753.4	22092	22092	20148	24738	9427.71	21654.6	8642.6	8589.47	9857.9	24446.9	25733	25733	4766.6	16119.5	8663.9	7766.4	7369.8	3579.21
	0.5	22624	22624	18917.2	25932.2	13433.8	23454.3	13181.6	10571.6	13112.2	23609.8	34863	34863	6413.4	17426.9	13398	13398.5	9494.7	2430.88	16141	10145.2	8500.3	5790.67	20536.2	11436.7	4216.92	8696	18132.9	8213.12	4942.7	11228.5	22467	22467	18760.2	25775.2	13276.8	23297.3	13024.6	10414.6	12955.2	23452.8	34706	34706	6256.4	17269.9	13241	13241.5	9337.7	2273.88
		19563	19563	15783.9	22962.4	11595.3	18020.9	9867.3	11329.6	13401.7	21230.9	34423	34423	4066.1	10527.5	11743.7	7794.3	8996.4	3012.47	14734	9875.08	7172.67	3143.46	23954.1	10315.6	3414.07	10507.8	19610.8	12017.8	5053.7	5624.3	19406	19406	15626.9	22805.4	11438.3	17863.9	9710.3	11172.6	13244.7	21073.9	34266	34266	3909.1	10370.5	11586.7	7637.3	8839.4	2855.47
		23093	23093	16476.7	23592.2	13165.6	16564	10683.9	11231	12334.2	20055.9	38509	38509	3257.2	10942.8	6729.1	12543.3	11151.6	5905.87	14183	10732.7	7810	2685.73	26686.3	8627.3	2786.86	12859.4	19344.8	7522.16	7670.3	10373.3	22936	22936	16319.7	23435.2	13008.6	16407	10526.9	11074	12177.2	19898.9	38352	38352	3100.2	10785.8	6572.1	12386.3	10994.6	5748.87
		26341	26341	15056.2	25675.7	15095.7	15055.9	7569.9	9895.72	14617.6	18778.8	35344	35344	5520.5	12565.5	16913.4	11716.8	10197.3	3072.47	14446.3	10356	7826.77	1981.89	26025.1	13906.6	3566.41	8749.3	23629.8	10144.9	8171.8	9546.8	26184	26184	14899.2	25518.7	14938.7	14898.9	7412.9	9738.72	14460.6	18621.8	35187	35187	5363.5	12408.5	16756.4	11559.8	10040.3	2915.47
		21625	21625	16295.9	26199.7	11394.3	13588	7543.8	9989.66	15512.7	19979.7	38629	38629	3280.8	11443.6	8110.2	7892	12486.8	1825.64	14586.2	11244.1	8328.56	2946.66	26515.4	10141.2	3729.37	5862.1	21804	9770.68	8026	5722	21468	21468	16138.9	26042.7	11237.3	13431	7386.8	9832.66	15355.7	19822.7	38472	38472	3123.8	11286.6	7953.2	7735	12329.8	1668.64
		22562	22562	17827.5	30262.6	11170.6	12838.2	4463.6	9577.99	14035.2	18997.3	34623	34623	4422.8	11613.9	13297.8	8833.8	10375.9	3050.34	10805.6	10577.1	8203.98	4150.28	23539.2	12059.5	3540.88	6357.6	22610.4	9869.08	10344.4	6663.8	22405	22405	17670.5	30105.6	11013.6	12681.2	4306.6	9420.99	13878.2	18840.3	34466	34466	4265.8	11456.9	13140.8	8676.8	10218.9	2893.34
		24623	24623	18101.5	30767.6	12423.9	10276.4	6640.9	9582.17	11761.2	15909.2	39911	39911	3625.4	11321.7	15395	10970.2	7629.8	3322.12	9108.54	9069.3	8723.67	1798.64	22083.7	13430	2826.06	4988.2	21625.9	9119.61	9468	8800.2	24466	24466	17944.5	30610.6	12266.9	10119.4	6483.9	9425.17	11604.2	15752.2	39754	39754	3468.4	11164.7	15238	10813.2	7472.8	3165.12
		26560	26560	20216.6	31136.1	11367.2	8279.4	6861	12145.1	12236.7	17906.2	35184	35184	6221.6	12648.9	18052.4	9756.6	9679.9	3277.88	11804.6	9165.56	10661.4	1229.55	21525.8	12955.8	3976.1	7298.4	22155.4	11350.2	10343.2	7586.6	26403	26403	20059.6	30979.1	11210.2	8122.4	6704	11988.1	12079.7	17749.2	35027	35027	6064.6	12491.9	17895.4	9599.6	9522.9	3120.88
		25279	25279	18446.1	33900	10250.1	8589.7	6097.2	9465.54	17324.3	19719.6	40552	40552	4018	13505	20152.3	12002.6	9636.2	425.93	8516.59	8986.15	9988.33	1851.07	19861.8	13014.7	6041.69	6231.2	23049.8	7303	12127.1	9832.6	25122	25122	18289.1	33743	10093.1	8432.7	5940.2	9308.54	17167.3	19562.6	40395	40395	3861	13348	19995.3	11845.6	9479.2	268.93
		24061	24061	19127.3	32326.4	11801.1	9489	6159.8	12323.1	14922.4	22054.5	36266	36266	9654.5	14283.4	20415.3	10472.1	8349.6	396.52	10607.8	5069.2	9283.13	3546.22	19968.1	15222	5192.74	5168.6	20514.5	9687.69	10891.8	8302.1	23904	23904	18970.3	32169.4	11644.1	9332	6002.8	12166.1	14765.4	21897.5	36109	36109	9497.5	14126.4	20258.3	10315.1	8192.6	239.52
		21781	21781	21546.5	32046.8	12987.4	9995.6	6581.1	11329.6	15214.2	21645.5	40472	40472	7888.2	16897.5	21371.9	10083.2	7878.6	1978.55	9357.78	7244.73	11050.2	4753.08	23192.9	15980.6	5026	4136	19873.2	8553.87	14051.7	7913.2	21624	21624	21389.5	31889.8	12830.4	9838.6	6424.1	11172.6	15057.2	21488.5	40315	40315	7731.2	16740.5	21214.9	9926.2	7721.6	1821.55
		26654	26654	20193.3	29053.5	11309.6	9501.9	7064.2	7763.73	18178.1	23024.5	36105	36105	4499	16490	20957.1	13591.4	6382.8	2804.42	11120	8240.53	10093.5	6675.67	19826.5	12316.1	4279.38	4285.2	20271.4	10728.8	13605.7	11421.4	26497	26497	20036.3	28896.5	11152.6	9344.9	6907.2	7606.73	18021.1	22867.5	35948	35948	4342	16333	20800.1	13434.4	6225.8	2647.42
		24467	24467	19448.8	26382.8	11340.3	9741	9633.1	8556.41	17189	23286.6	34783	34783	9185.6	16050	25585.1	11403.3	8356	3221.89	11488.8	6327.06	5603.49	2220.89	20810.8	10076.8	4563.55	5178.5	20732.5	10483.9	12399.3	9233.3	24310	24310	19291.8	26225.8	11183.3	9584	9476.1	8399.41	17032	23129.6	34626	34626	9028.6	15893	25428.1	11246.3	8199	3064.89
	0 (center)	23874	23874	20350.9	27476.6	11168.5	11466	7086.2	7160.76	18835.4	24994	40071	40071	9846.5	14404	21936.9	10500.4	9575.5	3386.97	10479.1	6496.48	8900.12	4192.07	20443.4	12482.2	5701.11	5417	17982.9	9584.9	9362.2	8330.4	23717	23717	20193.9	27319.6	11011.5	11309	6929.2	7003.76	18678.4	24837	39914	39914	9689.5	14247	21779.9	10343.4	9418.5	3229.97
[truncated: 851 more columns]

## Sheet: Fig. 3d (ttsA N166D)
Supplementary data set 3
corresponding Fig. 3d
ttsA N166D
experiment 1	1 (pole)	14581	13877	12638	7789	28279	15105	13232	6804	19763	14499	9291	17103	17924	15751	21324	16974	13203	16811	7905	13479	23360	24847	25847	15475	14771	13532	8683	29173	15999	14126	15946	15242	14003	9154	29644	16470	14597	8169	21128	15864	10656	18468	19289	17116	22689	18339	14568	18176
		16342	11670	9393	6785	25691	14904	10973	7026	22359	11010	8287	16802	19463	15450	18335	17396	11989	15681	10039	11582	26491	25651	28115	17236	12564	10287	7679	26585	15798	11867	17707	13035	10758	8150	27056	16269	12338	8391	23724	12375	9652	18167	20828	16815	19700	18761	13354	17046
		12285	13749	11390	7118	21695	13960	7111	8133	22396	16202	10909	17392	18934	16040	19215	16102	13257	16708	10577	9810	23140	22086	32322	13179	14643	12284	8012	22589	14854	8005	13650	15114	12755	8483	23060	15325	8476	9498	23761	17567	12274	18757	20299	17405	20580	17467	14622	18073
		17963	12163	8718	8312	21471	22077	11267	10002	21445	18039	11525	14027	18473	12675	16603	17980	10743	19720	9108	11088	23808	23330	30999	18857	13057	9612	9206	22365	22971	12161	19328	13528	10083	9677	22836	23442	12632	11367	22810	19404	12890	15392	19838	14040	17968	19345	12108	21085
		15425	14726	11182	6365	26093	14666	9530	7803	23037	17833	11816	12048	18142	10696	15893	17734	9825	18163	10509	10308	22522	21931	31114	16319	15620	12076	7259	26987	15560	10424	16790	16091	12547	7730	27458	16031	10895	9168	24402	19198	13181	13413	19507	12061	17258	19099	11190	19528
		17164	11646	11917	5639	24585	12793	9741	4737	23319	13656	12477	14560	16667	13208	16533	20854	10098	19254	8779	12171	22017	19997	30277	18058	12540	12811	6533	25479	13687	10635	18529	13011	13282	7004	25950	14158	11106	6102	24684	15021	13842	15925	18032	14573	17898	22219	11463	20619
		16535	10015	10894	5588	25416	16837	10786	7081	21346	14104	12197	12926	30359	11574	20616	13361	9561	19154	8876	12502	19967	21102	28536	17429	10909	11788	6482	26310	17731	11680	17900	11380	12259	6953	26781	18202	12151	8446	22711	15469	13562	14291	31724	12939	21981	14726	10926	20519
		17550	10848	9172	5331	25324	14453	8916	5642	21856	14815	13023	12094	26204	26204	16286	25472	12019	19524	9349	11451	20363	22451	30042	18444	11742	10066	6225	26218	15347	9810	18915	12213	10537	6696	26689	15818	10281	7007	23221	16180	14388	13459	27569	27569	17651	26837	13384	20889
		16538	10688	12496	4476	27592	14463	8236	7438	21808	14491	15956	12788	20216	30484	17522	24244	11715	17520	8244	11254	23080	23318	28794	17432	11582	13390	5370	28486	15357	9130	17903	12053	13861	5841	28957	15828	9601	8803	23173	15856	17321	14153	21581	31849	18887	25609	13080	18885
		14591	11001	14710	5597	31799	13128	9177	7108	18748	13183	15300	12692	22161	24517	17827	24983	11398	15630	7578	11154	20001	20774	28223	15485	11895	15604	6491	32693	14022	10071	15956	12366	16075	6962	33164	14493	10542	8473	20113	14548	16665	14057	23526	25882	19192	26348	12763	16995
		15823	9975	16583	6146	30476	12170	8723	8359	17259	13137	13923	10764	22524	20581	19359	23873	11292	16735	8919	10003	18614	21986	28826	16717	10869	17477	7040	31370	13064	9617	17188	11340	17948	7511	31841	13535	10088	9724	18624	14502	15288	12129	23889	21946	20724	25238	12657	18100
		14322	11942	15270	7094	30591	8243	11270	6191	16994	13272	17294	10695	14889	27391	19219	24190	12228	18326	7279	9691	20390	22844	21468	15216	12836	16164	7988	31485	9137	12164	15687	13307	16635	8459	31956	9608	12635	7556	18359	14637	18659	12060	16254	28756	20584	25555	13593	19691
	0.5	12243	10993	13786	5175	29754	11476	9901	9615	17051	13730	15527	12558	12892	23080	17607	24741	13429	18748	10660	11193	20419	21216	19445	13137	11887	14680	6069	30648	12370	10795	13608	12358	15151	6540	31119	12841	11266	10980	18416	15095	16892	13923	14257	24445	18972	26106	14794	20113
		32721	9683	16889	7405	28013	7789	10113	7210	17578	15394	17109	13057	14341	23705	16617	27791	16303	17454	9191	11465	17682	20216	19306	33615	10577	17783	8299	28907	8683	11007	34086	11048	18254	8770	29378	9154	11478	8575	18943	16759	18474	14422	15706	25070	17982	29156	17668	18819
		13128	11882	15587	5745	29519	11911	11144	4933	13445	16992	13349	14792	13810	20082	16481	28971	18585	19332	8337	11126	21706	22161	7697	14022	12776	16481	6639	30413	12805	12038	14493	13247	16952	7110	30884	13276	12509	6298	14810	18357	14714	16157	15175	21447	17846	30336	19950	20697
		13803	9274	12918	6068	28271	11423	11756	8137	11787	10797	17023	14531	18283	21206	14979	28264	17439	19086	7259	10380	17690	22524	12063	14697	10168	13812	6962	29165	12317	12650	15168	10639	14283	7433	29636	12788	13121	9502	13152	12162	18388	15896	19648	22571	16344	29629	18804	20451
		12816	10143	12250	6882	27700	12323	10179	9741	12747	10062	15578	13947	18295	24955	15063	27833	17706	22206	8329	10731	19097	14889	11991	13710	11037	13144	7776	28594	13217	11073	14181	11508	13615	8247	29065	13688	11544	11106	14112	11427	16943	15312	19660	26320	16428	29198	19071	23571
		12082	13036	13378	4755	28303	15150	9873	3743	9885	11242	16742	13014	20202	25829	16755	27048	17826	14713	5848	9535	16650	12892	9732	12976	13930	14272	5649	29197	16044	10767	13447	14401	14743	6120	29668	16515	11238	5108	11250	12607	18107	14379	21567	27194	18120	28413	19191	16078
		20073	10809	13789	5708	25551	16258	9678	9057	11216	13968	18127	10946	19012	23330	15521	17268	17444	7023	5602	10959	19020	14341	8009	20967	11703	14683	6602	26445	17152	10572	21438	12174	15154	7073	26916	17623	11043	10422	12581	15333	19492	12311	20377	24695	16886	18633	18809	8388
		16720	10540	13655	3823	26895	16446	8864	8007	12389	13640	16493	8906	17017	25923	13438	16669	16576	7424	6893	11559	18059	13810	19183	17614	11434	14549	4717	27789	17340	9758	18085	11905	15020	5188	28260	17811	10229	9372	13754	15005	17858	10271	18382	27288	14803	18034	17941	8789
		13645	9935	11076	7326	29207	17498	9942	8097	11435	12827	14920	8908	17924	25423	13511	15742	15963	11460	7659	11761	17416	11306	22909	14539	10829	11970	8220	30101	18392	10836	15010	11300	12441	8691	30572	18863	11307	9462	12800	14192	16285	10273	19289	26788	14876	17107	17328	12825
		14546	10961	12117	5879	30460	16992	9811	4887	12531	14559	12912	11034	19463	25173	23611	17574	16188	13836	7920	11456	17766	11200	26817	15440	11855	13011	6773	31354	17886	10705	15911	12326	13482	7244	31825	18357	11176	6252	13896	15924	14277	12399	20828	26538	24976	18939	17553	15201
		11813	11962	11951	3639	31001	19723	12247	7951	9229	14604	9991	10599	18934	27766	23611	14360	14678	13329	9660	11402	22424	10917	27178	12707	12856	12845	4533	31895	20617	13141	13178	13327	13316	5004	32366	21088	13612	9316	10594	15969	11356	11964	20299	29131	24976	15725	16043	14694
		13713	11037	12439	5332	32662	19522	12158	8768	9573	12512	9869	10833	18473	22175	14410	14482	16322	13033	11243	11849	13588	9549	30382	14607	11931	13333	6226	33556	20416	13052	15078	12402	13804	6697	34027	20887	13523	10133	10938	13877	11234	12198	19838	23540	15775	15847	17687	14398
		12046	10480	8599	5726	32293	22630	11798	7006	9075	11360	10098	11901	18142	24674	16418	14955	14983	14312	9064	10852	14111	11116	26531	12940	11374	9493	6620	33187	23524	12692	13411	11845	9964	7091	33658	23995	13163	8371	10440	12725	11463	13266	19507	26039	17783	16320	16348	15677
	0 (center)	10767	8060	7887	5813	30699	20486	12305	5804	11159	13334	11485	14144	16667	20581	16460	15819	16195	14086	7278	11688	13963	13457	27798	11661	8954	8781	6707	31593	21380	13199	12132	9425	9252	7178	32064	21851	13670	7169	12524	14699	12850	15509	18032	21946	17825	17184	17560	15451
[truncated: 852 more columns]
