# Supplementary material for: Mechanisms of substrate recognition by a typhoid toxin secretion-associated muramidase
Source: eLife. 2020 Jan 20;9:e53473. doi: 10.7554/eLife.53473 (PMC6996933; doi:10.7554/eLife.53473)
Supplement: Figure 4—source data 1. [file elife-53473-fig4-data1.xlsx]

## Sheet: Fig. 4e
Supplementary data set 4
corresponding Fig. 4e
experiment 1	WT (CdtB-FLAG)	∆ttsA (CdtB-FLAG) + TtsA WT	∆ttsA (CdtB-FLAG) + TtsA E14A	∆ttsA (CdtB-FLAG) + TtsA I116D	∆ttsA (CdtB-FLAG) + TtsA D118A	∆ttsA (CdtB-FLAG) + TtsA N166D	∆ttsA (CdtB-FLAG) + TtsA Q120R	∆ttsA (CdtB-FLAG) + TtsA Q164E
	0.8	0.89	0.01	0.02	0.19	0.09	0.76	0.85
	0.76	0.97	0.02	0.01	0.2	0.12	0.87	0.89
	0.74	0.78	0.03	0.015	0.18	0.06	0.97	0.94
	0.78	0.95	0.01	0.03	0.15	0.12	0.67	0.95
	0.84	0.86	0.02	0.024	0.16	0.03	0.94	0.92
	0.87	0.88	0.04	0.01	0.2	0.12	0.67	0.56
	0.89	0.99	0.01	0.005	0.18	0.05	0.78	0.67
	0.92	0.92	0.06	0.01	0.17	0.04	0.83	0.67
	0.94	0.67	0.09	0.06	0.11	0.03	0.83	0.87
	0.91	0.87	0.1	0.05	0.19	0.01	0.85	0.76
experiment 2
	0.86	0.89	0.02	0.08	0.23	0.04	0.78	0.94
	0.94	0.92	0.01	0.01	0.15	0.02	0.94	0.88
	0.93	0.93	0.01	0.08	0.2	0.06	0.65	0.79
	0.87	0.78	0.04	0.02	0.2	0.08	0.87	0.81
	0.9	0.89	0.02	0.09	0.18	0.04	0.59	0.84
	0.78	0.84	0.02	0.03	0.12	0.02	0.78	0.98
	0.93	0.92	0.03	0.05	0.1	0.03	0.67	0.95
	0.89	0.76	0.02	0.01	0.09	0.01	0.65	0.85
	0.93	0.67	0.01	0.04	0.08	0.04	0.67	0.89
	0.92	0.86	0.01	0.045	0.8	0.05	0.76	0.91
experiment 3
	0.87	0.94	0.04	0.03	0.08	0.01	0.89	0.92
	0.78	0.95	0.05	0.01	0.11	0.01	0.85	0.83
	0.74	0.05	0.05	0.04	0.13	0.03	0.87	0.79
	0.83	0.87	0.06	0.02	0.12	0.02	0.89	0.91
	0.75	0.84	0.03	0.01	0.1	0.04	0.84	0.69
	0.83	0.83	0.02	0.04	0.07	0.01	0.76	0.74
	0.93	0.92	0.02	0.04	0.04	0.04	0.78	0.93
	0.85	0.78	0.01	0.05	0.14	0.06	0.78	0.94
	0.93	0.82	0.05	0.01	0.23	0.06	0.87	0.95
	0.76	0.92	0.06	0.01	0.21	0.01	0.65	0.85
